# Supplementary material for: The demographics and geographic distribution of laboratory-confirmed Lyme disease cases in England and Wales (2013–2016): an ecological study
Source: PubMed Central journal article supplement (PMC6677960; doi:10.1136/bmjopen-2018-028064), 2019-07-31

## **Supplementary Material 1**

The English Indices of Deprivation (EID) ranks 32,844 geographies (Lower super output areas) containing between 1000 and 3000 population and groups these in to deciles where 1 represents the areas with the highest levels of deprivation and 10 the lowest. The Welsh Index of Multiple Deprivation (WIMD) is ranked in a similar manner but is then grouped into the following categories; the 10% with the greatest deprivation, moving up through decreasing levels of deprivation in intervals from 10-20%, 20-30%, 30-50%, and the 50% least deprived areas. The EID and WIMD categorise each geographical area with a variety of deprivation domain scores to build a summary index figure (Supplementary Table 1).

Supplementary Table 1. Summary of the English Indices of Deprivation 2015[33] and Welsh Index of Multiple Deprivation[34] domains, and their weighting to calculate an Index of Multiple Deprivation

| <b>English Indices of Deprivation (EID) Domain</b>       | <b>Description</b>                                                                                                                     | <b>Weighting for construction of Index of Multiple Deprivation (IMD)</b>        |
|----------------------------------------------------------|----------------------------------------------------------------------------------------------------------------------------------------|---------------------------------------------------------------------------------|
| Income Deprivation Domain                                | Proportion of population experiencing deprivation due to low income                                                                    | 22.5%                                                                           |
| Employment Deprivation Domain                            | Proportion of working age population excluded from the labor market                                                                    | 22.5%                                                                           |
| Education, Skills and Training Deprivation Domain        | Measures the lack of attainment and skills in the local population                                                                     | 13.5%                                                                           |
| Health Deprivation and Disability Domain                 | Measures the risk of premature death and the impairment of quality of life through poor physical or mental health                      | 13.5%                                                                           |
| Crime Domain                                             | Measures the risk of personal and material victimisation at local level                                                                | 9.3%                                                                            |
| Barriers to Housing and Services Domain                  | Measures the physical and financial accessibility of housing and local services (schools, supermarkets, primary care and post offices) | 9.3%                                                                            |
| Living Environment Deprivation Domain                    | Measures the quality of the local environment (housing, air quality and road traffic accidents)                                        | 9.3%                                                                            |
| <b>Index of Multiple Deprivation (IMD)</b>               | <b>Overall measure of deprivation constructed by the weighted sum of the above domains</b>                                             |                                                                                 |
| <b>Welsh Index of Multiple Deprivation (WIMD) Domain</b> | <b>Description</b>                                                                                                                     | <b>Weighting for construction of Welsh Index of Multiple Deprivation (WIMD)</b> |
| Income Domain                                            | Proportion of population experiencing deprivation due to low income                                                                    | 23.5%                                                                           |
| Employment Domain                                        | Proportion of working age population excluded from the labor market                                                                    | 23.5%                                                                           |
| Health Domain                                            | Measures the lack of good health                                                                                                       | 14.0%                                                                           |
| Education Domain                                         | Measures the extent of deprivation relating to education, training and skills                                                          | 14.0%                                                                           |
| Access to Services Domain                                | Measures deprivation due to a house holds inability to access services considered necessary for day to day living.                     | 10.0%                                                                           |
| Community Safety Domain                                  | Measures deprivation relating to living in a safe community                                                                            | 5.0%                                                                            |
| Physical Environment Domain                              | Measures factors in the local area that may impact on wellbeing or quality of life                                                     | 5.0%                                                                            |
| Housing Domain                                           | Measures deprivation through lack of adequate housing                                                                                  | 5.0%                                                                            |
| <b>Welsh Index of Multiple Deprivation (WIMD)</b>        | <b>Overall measure of deprivation constructed by the weighted sum of the above domains</b>                                             |                                                                                 |

## Supplementary Material 2

Supplementary Figure - Relationship between laboratory-confirmed Lyme disease case numbers (2013-2016) in England and the component measures of the English Indices of Deprivation 2015.

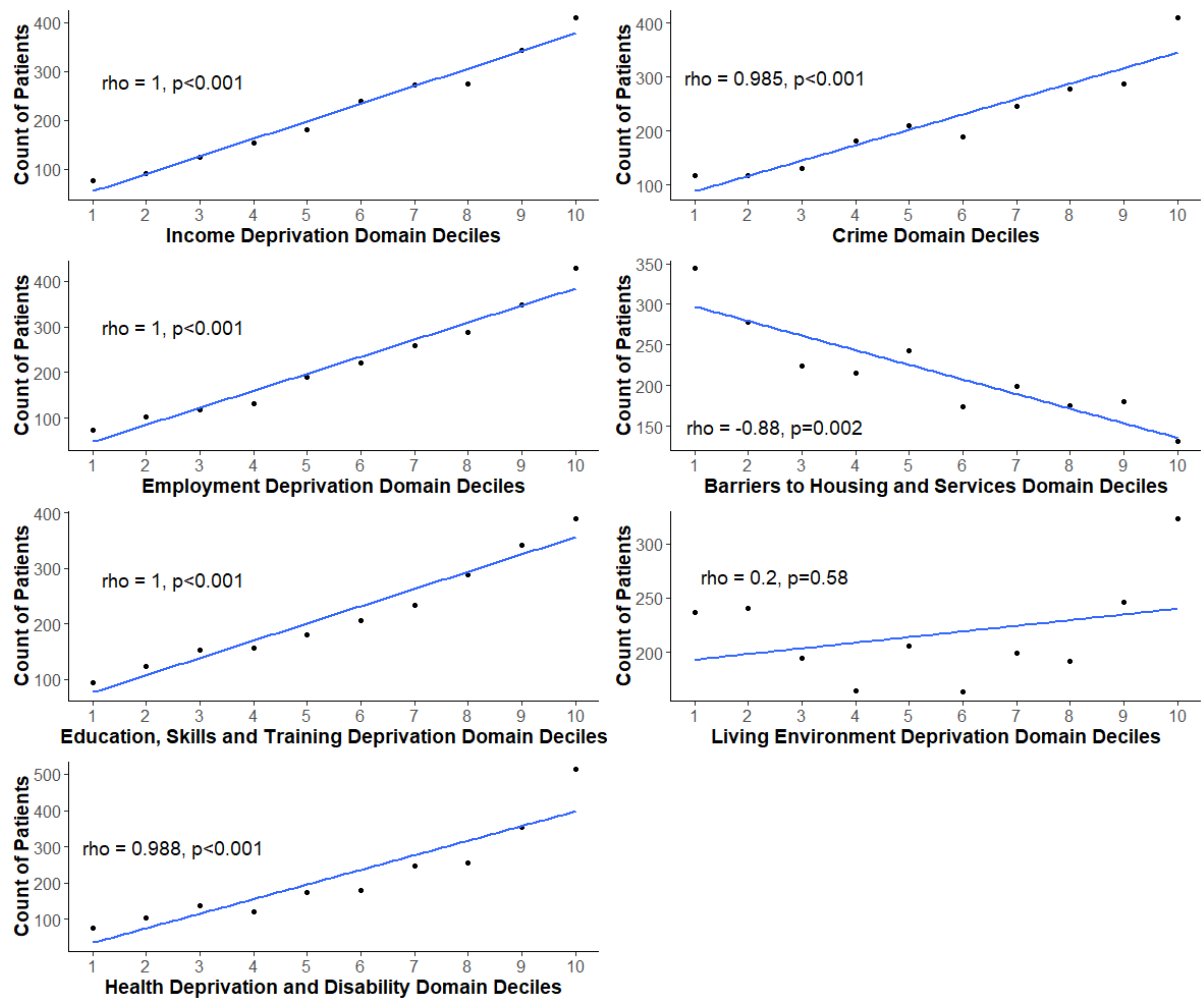

Supplement: bmjopen-2018-028064supp001.pdf [file bmjopen-2018-028064supp001.pdf]
