# Supplementary material for: The demographics and geographic distribution of laboratory-confirmed Lyme disease cases in England and Wales (2013–2016): an ecological study
Source: PubMed Central journal article supplement (PMC6677960; doi:10.1136/bmjopen-2018-028064), 2019-07-31
Supplement: bmjopen-2018-028064.draft_revisions.pdf [file bmjopen-2018-028064.draft_revisions.pdf]

# BMJ Open

BMJ Open is committed to open peer review. As part of this commitment we make the peer review history of every article we publish publicly available.

When an article is published we post the peer reviewers' comments and the authors' responses online. We also post the versions of the paper that were used during peer review. These are the versions that the peer review comments apply to.

The versions of the paper that follow are the versions that were submitted during the peer review process. They are not the versions of record or the final published versions. They should not be cited or distributed as the published version of this manuscript.

BMJ Open is an open access journal and the full, final, typeset and author-corrected version of record of the manuscript is available on our site with no access controls, subscription charges or pay-per-view fees (<http://bmjopen.bmj.com>).

If you have any questions on BMJ Open's open peer review process please email [info.bmjopen@bmj.com](mailto:info.bmjopen@bmj.com)

# BMJ Open

## The demographics and geographic distribution of laboratory-confirmed Lyme disease cases in England and Wales; 2013-2016

|                               |                                                                                                                                                                                                                                                                                                                                                                                                                                                                                                                                                                                                                                                                                                                                                                                                                                                                                                                                                                                                                                                                                                                                                                                                                                                                                                                                           |
|-------------------------------|-------------------------------------------------------------------------------------------------------------------------------------------------------------------------------------------------------------------------------------------------------------------------------------------------------------------------------------------------------------------------------------------------------------------------------------------------------------------------------------------------------------------------------------------------------------------------------------------------------------------------------------------------------------------------------------------------------------------------------------------------------------------------------------------------------------------------------------------------------------------------------------------------------------------------------------------------------------------------------------------------------------------------------------------------------------------------------------------------------------------------------------------------------------------------------------------------------------------------------------------------------------------------------------------------------------------------------------------|
| Journal:                      | <i>BMJ Open</i>                                                                                                                                                                                                                                                                                                                                                                                                                                                                                                                                                                                                                                                                                                                                                                                                                                                                                                                                                                                                                                                                                                                                                                                                                                                                                                                           |
| Manuscript ID                 | bmjopen-2018-028064                                                                                                                                                                                                                                                                                                                                                                                                                                                                                                                                                                                                                                                                                                                                                                                                                                                                                                                                                                                                                                                                                                                                                                                                                                                                                                                       |
| Article Type:                 | Research                                                                                                                                                                                                                                                                                                                                                                                                                                                                                                                                                                                                                                                                                                                                                                                                                                                                                                                                                                                                                                                                                                                                                                                                                                                                                                                                  |
| Date Submitted by the Author: | 20-Nov-2018                                                                                                                                                                                                                                                                                                                                                                                                                                                                                                                                                                                                                                                                                                                                                                                                                                                                                                                                                                                                                                                                                                                                                                                                                                                                                                                               |
| Complete List of Authors:     | Tulloch, John; University of Liverpool, NIHR Health Protection Research Unit in Emerging and Zoonotic Infections; Public Health England<br>Semper, Amanda; Public Health England, NIHR Health Protection Research Unit in Emerging and Zoonotic Infections; Public Health England, Rare and Imported Pathogens Laboratory<br>Brooks, Tim; Public Health England, NIHR Health Protection Research Unit in Emerging and Zoonotic Infections; Public Health England, Rare and Imported Pathogens Laboratory<br>Russell, Katherine; Public Health England<br>Halsby, Kate; Public Health England<br>Christley, Robert; University of Liverpool, NIHR Health Protection Research Unit in Emerging and Zoonotic Infections; University of Liverpool, Institute of Infection and Global Health<br>Radford, Alan; University of Liverpool, NIHR Health Protection Research Unit in Emerging and Zoonotic Infections; University of Liverpool, Institute of Infection and Global Health<br>Vivancos, Roberto; Public Health England, Field Epidemiology Services; Public Health England, NIHR Health Protection Research Unit in Emerging and Zoonotic Infections<br>Warner, Jenny; Public Health England, NIHR Health Protection Research Unit in Emerging and Zoonotic Infections; Public Health England, Rare and Imported Pathogens Laboratory |
| Keywords:                     | Lyme disease, Lyme borreliosis, Epidemiology < INFECTIOUS DISEASES, England, surveillance, laboratory                                                                                                                                                                                                                                                                                                                                                                                                                                                                                                                                                                                                                                                                                                                                                                                                                                                                                                                                                                                                                                                                                                                                                                                                                                     |
|                               |                                                                                                                                                                                                                                                                                                                                                                                                                                                                                                                                                                                                                                                                                                                                                                                                                                                                                                                                                                                                                                                                                                                                                                                                                                                                                                                                           |

SCHOLARONE™  
Manuscripts

1  
2  
3 **Title: The demographics and geographic distribution of laboratory-confirmed Lyme disease**  
4  
5 **cases in England and Wales; 2013-2016**  
6  
7

8 **Authors:** John S.P. Tulloch<sup>1,2</sup>, Amanda E. Semper<sup>3,4</sup>, Tim J.G. Brooks<sup>3,4</sup>, Katherine Russell<sup>5</sup>,  
9  
10  
11 Kate D. Halsby<sup>5</sup>, Rob M. Christley<sup>1,6</sup>, Alan D. Radford<sup>1,6</sup>, Roberto Vivancos<sup>2,7</sup>, Jenny C.  
12  
13 Warner<sup>3,4</sup>  
14

- 15  
16 1. NIHR Health Protection Research Unit in Emerging and Zoonotic Infections,  
17  
18 University of Liverpool, L69 3GL, UK.  
19  
20  
21 2. Public Health England, Liverpool, L3 1DS, UK  
22  
23  
24 3. NIHR Health Protection Research Unit in Emerging and Zoonotic Infections, Public  
25  
26 Health England, Porton Down, SP4 0JQ, UK.  
27  
28  
29 4. Rare and Imported Pathogens Laboratory, Public Health England, Porton Down, SP4  
30  
31 0JQ, UK  
32  
33  
34 5. Public Health England, London, NW9 5EQ, UK  
35  
36  
37 6. Institute of Infection and Global Health, University of Liverpool, Liverpool, CH64 7TE,  
38  
39 UK  
40  
41  
42 7. NIHR Health Protection Research Unit in Emerging and Zoonotic Infections, Public  
43  
44 Health England, Liverpool, L3 1DS, UK.  
45  
46  
47

48 **Corresponding authors:** John Tulloch; [jtulloch@liverpool.ac.uk](mailto:jtulloch@liverpool.ac.uk); Public Health England,  
49  
50 Cunard Building, Water Street, Liverpool, L3 1DS, UK; +44 0344 225 0562  
51

52  
53 Jenny Warner; [jenny.warner@phe.gov.uk](mailto:jenny.warner@phe.gov.uk); Rare and Imported  
54  
55 Pathogens Laboratory, Public Health England, Porton Down, SP4 0JQ, UK; +44 01980 612899  
56  
57  
58  
59

60 **Word count:** 3571

1  
2  
3 **Title: The demographics and geographic distribution of laboratory-confirmed Lyme disease**  
4  
5 **cases in England and Wales; 2013-2016**  
6  
7

8 **Abstract**  
9

10  
11 **Objective:** Lyme disease is a tick-borne disease of increasing incidence and public concern  
12  
13 across the Northern Hemisphere. However, the socio-demographics and geographic  
14  
15 distribution of the population affected in England and Wales are poorly understood.  
16  
17 Therefore, the proposed study was designed to describe the demographics and distribution  
18  
19 of laboratory-confirmed cases of Lyme disease from a national testing laboratory.  
20  
21  
22

23  
24  
25 **Design:** An ecological study of routinely collected laboratory surveillance data  
26

27  
28 **Setting:** Public Health England's national Lyme disease testing laboratory.  
29

30  
31 **Participants:** 3,986 laboratory-confirmed cases of Lyme disease between 2013 and 2016.  
32

33  
34 **Results:** In England and Wales, the incidence of laboratory-confirmed Lyme disease rose  
35  
36 significantly over the study period, from 1.62 cases per 100,000 in 2013 to 1.95 cases per  
37  
38 100,000 in 2016. There was a bimodal age distribution (with peaks at 6-10 and 61-65 years  
39  
40 age bands) with a predominance of male patients. A significant clustering of areas with high  
41  
42 Lyme disease incidence was located in southern England. An association was found between  
43  
44 disease incidence and socioeconomic status, based on the patient's resident postcode, with  
45  
46 more cases found in less deprived areas. Cases were disproportionately found in rural areas  
47  
48 compared to the national population distribution.  
49  
50  
51

52  
53  
54 **Conclusions:** These results suggest that Lyme disease patients originate from areas with  
55  
56 higher socioeconomic status and disproportionately in rural areas. Identification of the Lyme  
57  
58  
59  
60

disease hotspots in southern England, alongside the socio-demographics described, will enable a targeted approach to public health interventions and messages.

**Keywords:** Lyme disease; Lyme borreliosis; epidemiology; England; Wales; surveillance; laboratory

### Strengths and limitations of this study

- This study is based upon a national testing laboratory's figures and provides a much needed update on basic epidemiological information about Lyme disease in England and Wales.
- Data on the socio-economic status of Lyme disease cases is globally sparse; our findings will have implications for future public health awareness and intervention schemes and may offer new avenues for research.
- Lyme disease incidence maps have been produced to a high resolution and show significant clustering of disease; providing public health organisations with locales to target interventions.
- Geographical data, and associated variables, were based upon patient residence information rather than tick bite location.
- The study was of an ecological design and positive cases were compared to the national population, therefore no measures of risk or multivariable analysis of demographic variables were possible.

## Introduction

Lyme disease is an important zoonotic tick-borne disease caused by spirochaetes of the *Borrelia burgdorferi sensu lato* genospecies complex. It is spread through the bites of infected *Ixodes* ticks, in the United Kingdom (UK) primarily *Ixodes Ricinus*. [1] Autochthonous cases are found solely in the northern hemisphere. [2,3] Most commonly, early infection presents with an erythema migrans rash, with associated generalised flu-like symptoms. [4] Neurological manifestations, such as facial nerve palsy, can occur as part of early disseminated infection. [2] The varied presentation of the disease and the potential of increased tick exposure risk due to the extension of tick habitats as a result of changes in land management, climate and human activity, has resulted in heightened awareness and surveillance by public health organisations. [5,6]

In Western Europe the population-weighted incidence has been estimated at 22.04 cases per 100,000 person-years. [7] In the UK, Lyme disease is not a notifiable disease, but laboratory-confirmed *Borrelia* spp. are notifiable causative organisms. [8] Public Health England (PHE) compiles data on laboratory-confirmed cases of Lyme disease in England and Wales, which show a rise in the national incidence of confirmed cases from 0.38 per 100,000 population in 1997 [9] to 1.95 per 100,000 population in 2016. [10] Data on laboratory-confirmed cases are provided by the national diagnostic laboratory, the PHE Rare and Imported Pathogens Laboratory (RIPL), which provides specialist advice and diagnostics for Lyme disease to the National Health Service (NHS) in England and Wales. Laboratory testing is based on serological diagnosis using a combination of screening and confirmatory immunoassays in accordance with internationally accepted best practice for Lyme disease diagnosis. [4,11,12] The incidence of cases which do not require laboratory diagnostics is unknown. These cases are most likely

1  
2  
3 presented to and are clinically-diagnosed and managed solely within primary care, as  
4 recommended by The National Institute for Health and Care Excellence (NICE) guidelines.[4]  
5  
6

7  
8 Information regarding the demographics of Lyme disease cases in England and Wales is  
9 limited. Laboratory surveillance data published in 2000 describe an equal sex ratio at all ages,  
10 however, numbers were not provided and statistical comparison was not performed.[13]  
11  
12

13 They describe a bimodal age distribution with peaks in childhood and at 45-64 years old.  
14 Hospital admissions data investigating Lyme disease and Bell's palsy describe a similar  
15 bimodal distribution.[14] These findings are similar to other European countries.[15–17]  
16  
17

18 There is a sparsity of recent demographic data for Lyme disease in England and Wales. The  
19 geographic distribution of confirmed cases was last described in 2000.[13] They describe a  
20 tendency for cases in southern England, especially around the New Forest. However, this data  
21 may not reflect the current distribution of Lyme disease cases in England and Wales. More  
22 current data is urgently needed to enable targeted public health messaging and intervention  
23 strategies.  
24  
25  
26  
27  
28  
29  
30  
31  
32  
33  
34  
35  
36

37 Globally, the negative income and education gradient of health has helped shape public  
38 health strategy and policy.[18,19] As a person's position on the socioeconomic spectrum  
39 increases, so their likelihood of better health increases. Such potentially avoidable disparities  
40 in health has led to an increased focus on understanding the social determinants of health[20]  
41 and developing measures to address these. Work to explore the association between  
42 socioeconomic status and Lyme disease incidence is limited. In the United States of America  
43 (USA) persons were to found to be at greatest risk of Lyme disease if they lived in the highest  
44 or lowest socially vulnerable areas.[21] Two studies found a relationship between Lyme  
45 disease incidence and median annual household income, with incidence peaking at around  
46  
47  
48  
49  
50  
51  
52  
53  
54  
55  
56  
57  
58  
59  
60

1  
2  
3 80,000 USD.[22,23] However, a consistent relationship between the socioeconomic state of  
4  
5 an individual and their Lyme disease acquisition risk has yet to emerge. In particular, no in-  
6  
7 depth research has been performed in Europe investigating the socioeconomics of the Lyme  
8  
9 disease patient cohort.  
10  
11

12  
13 The aim of this study was to utilise information collected through routine surveillance in  
14  
15 England and Wales to describe the demographics and geographic distribution of laboratory-  
16  
17 confirmed Lyme disease cases over a four year period. Correlations between Lyme disease  
18  
19 incidence and socioeconomic indices were analysed, using patient residence postcode as a  
20  
21 proxy for individual patient characteristics. New insight will be provided into the key  
22  
23 demographic, geographical and social determinants of the Lyme disease patient population.  
24  
25 This would allow us to identify potentially at-risk populations, shape public health  
26  
27 interventions and assist in appropriate disease awareness.  
28  
29  
30  
31  
32

### 33 **Method**

34  
35 A retrospective analysis was performed using data extracted from the PHE Rare and Imported  
36  
37 Pathogens Laboratory's (RIPL) laboratory information management system (LIMS), between  
38  
39 1<sup>st</sup> January 2013 and 31<sup>st</sup> December 2016, for laboratory-confirmed Lyme disease cases, the  
40  
41 same data as used for PHE's Zoonoses Report.[24] The RIPL LIMS contains information  
42  
43 provided on the Lyme disease referral form submitted at the time of sample submission and  
44  
45 any additional information provided by clinicians during case follow up and management.[25]  
46  
47 The form captures information on the age, gender, location, clinical symptoms and travel  
48  
49 history of the patient. Data were cleaned and duplicates were removed where necessary.  
50  
51  
52  
53  
54

55  
56 Annual Lyme disease incidence estimates were calculated, using the Office for National  
57  
58 Statistics (ONS) mid-year population estimates as the denominator population.[26] A Chi-  
59  
60



1  
2  
3 squared test for trend and a Chi-squared test for departure from the trend were used to  
4  
5 analyse trends in incidence. Cases were stratified by age and gender. Using binomial tests,  
6  
7 the null hypothesis that there was no difference in case numbers between males and females  
8  
9 was tested within differing age bands, and overall.  
10  
11

12  
13 Geographical information was collated based on (1) the regional origin of a diagnostic sample  
14  
15 (usually a hospital microbiology department) consisting of eight PHE regions, and Wales as a  
16  
17 whole,[27] and (2) the postcode area of the patient. These were used to calculate average  
18  
19 annual incidence for the study period. In an attempt to account for the unknown distance  
20  
21 between a patient's home address and where they were bitten, the disease incidence map  
22  
23 for postcode area was smoothed using a k-nearest neighbours (k-NN) approach;[28–30] this  
24  
25 was In this approach, k is defined as the number of neighbours used for smoothing and is  
26  
27 equal to the square root of the total number of discrete geographical areas rounded to the  
28  
29 nearest whole odd number (i.e. 105 postcode areas, its square root being 10.2, therefore  
30  
31 k=11). Exploratory spatial data analysis (EDSA)[31,32] was used to explore the spatial  
32  
33 autocorrelation of the postcode area incidence map. Global and local Moran's I values were  
34  
35 calculated, and a LISA (Local Indicators of Spatial Association) significance map constructed  
36  
37 to highlight any significant clusters. In both the k-NN smoothing and Moran's I calculations, a  
38  
39 queen adjacency matrix was used.  
40  
41  
42  
43  
44  
45  
46  
47

48 Patient postcode was linked to ONS socioeconomic data,[26] enabling a description of the  
49  
50 socioeconomic characteristics of the population in which a Lyme disease case was resident. If  
51  
52 no patient postcode was recorded, these cases were excluded from the analysis.  
53  
54 Socioeconomic status is reported through the English Indices of Deprivation (EID) 2015[33]  
55  
56 and the Welsh Index of Multiple Deprivation (WIMD) 2014[34] (Supplementary material 1).  
57  
58  
59  
60

1  
2  
3 Postcode area case count data were matched independently to the EID and WIMD, and a rural  
4 urban classification. As EID and WIMD are on a discrete ordinal scale, Spearman's rank  
5 correlation was used to calculate the correlation between the number of cases and  
6 deprivation score. The proportion of cases with their home addresses located in either a rural  
7 or urban area, were compared to the national rural urban classification from the ONS.[35]  
8 This was performed using a Chi-squared test of independence for both English and Welsh  
9 data.

10  
11  
12  
13  
14  
15 All statistical and spatial analyses were carried out using R language (version 3.2.0) (R Core  
16 Team 2015). Results were deemed significant where  $p < 0.05$ .

## 27 Results

28  
29 In total 3,986 unique cases, 3,893 cases in England and 93 in Wales, meeting a serological  
30 diagnosis of Lyme disease were identified in the RIPL LIMS between 1<sup>st</sup> January 2013 and the  
31 31<sup>st</sup> December 2016. Of these, 98.7% (n=3,935) had complete records for date of submission,  
32 gender and age.

33  
34  
35  
36  
37  
38  
39  
40 The annual incidence of laboratory-confirmed Lyme disease cases in England and Wales rose  
41 from 1.62 per 100,000 population in 2013, to 1.95 in 2016. These figures are identical to PHE's  
42 official incidence figures as they used the same data source.[10] There was evidence of an  
43 overall association between incidence and year ( $\chi^2=43.13$ ,  $p < 0.001$ ). This association took the  
44 form of a trend with increasing incidence each year ( $\chi^2=30.17$ ,  $p < 0.001$ ). Departures from the  
45 trend were significant ( $\chi^2=43.1-30.1=12.96$ ,  $p < 0.001$ ), as shown by the fall in incidence in  
46 2014. There was marked seasonality, with the peak numbers of cases being diagnosed in the  
47 summer months each year (Fig 1).

1  
2  
3 Across all ages there were significantly more male (n=2,096) than female (n=1,839) cases ( $p <$   
4 0.001), with a bimodal age distribution, with peaks at 6-10 and 61-65 year age bands (Fig 2).  
5  
6 Grouping the data in 5-year age bands, there were significantly more men than women in the  
7  
8 6-10 ( $p=0.03$ ), 11-15 ( $p=0.03$ ), 36-40 ( $p=0.01$ ), 41-45 ( $p=0.02$ ), and 46-50 ( $p=0.04$ ) age groups.  
9  
10  
11 Data were available about PHE regions for 99.9% (n=3,985) of the study population (Fig 3a),  
12  
13 and about patient residence postcode area for 58.2% (n=2,321). The South West PHE region  
14  
15 had the highest incidence of Lyme disease in England and Wales; none of the PHE regions,  
16  
17 nor Wales, reported zero cases. The postcode areas with the highest average annual  
18  
19 incidence of Lyme disease were Southampton (11.65 cases per 100,000 per year), Salisbury  
20  
21 (10.75), Bournemouth (5.62), Reading (4.59), Dorchester (4.57), Guildford (4.31), Taunton  
22  
23 (2.79), Torquay (2.75), Brighton (1.96), and Bath (1.84) (Fig 3b). These areas are all in southern  
24  
25 England. Only four postcode areas had no laboratory-confirmed cases in the four year  
26  
27 surveillance period (Fig 3b), namely Dartford, Eastern Central London, Hull, and Western  
28  
29 Central London. The smoothed data showed a trend for the areas of highest incidence to be  
30  
31 located in southern-central England (Fig 3c). There was significant spatial autocorrelation, the  
32  
33 global Moran's I was 0.564 ( $p=0.01$ ), indicating that postcode areas with similar incidence are  
34  
35 clustered together. LISA mapping identified six areas as significant clusters of high incidence  
36  
37 (Fig 3d); Southampton, Salisbury, Bournemouth, Reading, Dorchester, and Guildford (for all  
38  
39  $p < 0.001$ ).

40  
41  
42 Using patient residence postcode data, it was possible to match 55.6% (n=2,165) of English  
43  
44 records to the English Indices of Deprivation and 98.2% (n=92) of Welsh records to the Welsh  
45  
46 Index of Multiple Deprivation (WIMD). An overall significant positive correlation between the  
47  
48 number of cases and Index of Multiple Deprivation (IMD) decile was observed ( $p=0.96$ ,  
49  
50  
51  
52  
53  
54  
55  
56  
57  
58  
59  
60

p<0.001), with more Lyme disease cases found in less deprived areas (Fig 4). This significant positive correlation was seen across all domains of deprivation, except the 'Barriers to Housing and Services Domain' where this trend was reversed ( $\rho=-0.88$ ,  $p=0.002$ ) and the 'Living Environment Deprivation Domain' where there was no significant correlation ( $\rho=0.2$ ,  $p=0.58$ ) (Supplementary material 2). An overall significant positive correlation between the number of cases and WIMD rank was observed ( $\rho=0.89$ ,  $p=0.04$ ), with more Lyme disease cases found in the least deprived areas.

When compared to the national population, the study population was disproportionately more likely to live in a rural area, for both English ( $p<0.001$ ) and Welsh ( $p<0.001$ ) sections of the study population (Table 1).

Table 1 – The rural urban classification of laboratory-confirmed cases of Lyme disease in England and Wales (2013-2016) compared to the national census population

| Category | Percentage of English Study Population | Percentage of Welsh Study Population | Percentage of 2015 census population |
|----------|----------------------------------------|--------------------------------------|--------------------------------------|
| Rural    | 34.3% (n=743)                          | 47.8% (n=44)                         | 17.9%                                |
| Urban    | 65.7% (n=1,422)                        | 52.2% (n=48)                         | 82.1%                                |

## Discussion

Between 2013 and 2016 there was a significant increase in annual incidence of cases of confirmed Lyme disease, with a seasonality that matched previous publications and has been well documented.[9] The observed seasonality closely matches *I. ricinus* tick population dynamics in the UK, which annually peak around June and July.[1,36] Concerns have been raised about how the expansion of tick habitats due to changes in land use and management, and climate change, may be increasing the risk of Lyme disease infection.[5,37] Although the

1  
2  
3 incidence of confirmed cases increased over the study period, there was significant deviation  
4  
5 from the trend, most notably in 2014. The reasons behind this variable, but increasing,  
6  
7 incidence of Lyme disease are likely to be multifactorial and may include raised public and  
8  
9 practitioner awareness, variable weather patterns causing alterations in tick abundance  
10  
11 and/or carriage of *B. burgdorferi s.l.*, and changes in human activity and behaviour.  
12  
13  
14  
15

16 This study observed a bimodal age distribution, with peaks at 6-10 and 61-65 years, and an  
17  
18 overall predominance of males. This bimodal distribution has been reported in other  
19  
20 European countries,[15–17] and matches previous UK studies.[13,14] However, the  
21  
22 predominance of males in the current study population does not concur with other European  
23  
24 studies, where women are over-represented.[15–17] In the USA, Lyme disease is more  
25  
26 prevalent in males compared to females less than 60 years old, and equal or higher in women  
27  
28 above 60 than among men.[2] In contrast, more men were hospitalised in France due to Lyme  
29  
30 disease and more women were diagnosed by general practitioners.[38] Historically, in  
31  
32 England and Wales, Lyme disease incidence in men and women has been similar.[13,14] The  
33  
34 male predominance in this study may be due to the difference in health seeking behaviour  
35  
36 between genders, with women more likely to seek healthcare at early stages of illness.[39] By  
37  
38 presenting at later stages of Lyme disease, when pathognomonic signs may have waned, male  
39  
40 cases may require laboratory confirmation more frequently. Further work is needed to  
41  
42 establish the causes behind these gender differences and whether they are related to  
43  
44 environmental or behavioral risk factors, such as occupation, leisure activities, or differences  
45  
46 in health seeking behaviours.  
47  
48  
49  
50  
51  
52  
53

54  
55 There was geographical variation in Lyme disease incidence across patient residence postcode  
56  
57 area in England and Wales, based on 58.2% of laboratory-confirmed cases. The global Moran's  
58  
59  
60

1  
2  
3 I statistic showed that there was significant positive spatial autocorrelation, and clusters of  
4 high incidence were found in southern England. This area includes the New Forest National  
5 Park, the South Downs National Park, Salisbury Plain, Cranborne Chase Area of Outstanding  
6 Natural Beauty (AONB), Dorset AONB and Purbeck Heritage Coast. These are all popular  
7 destinations for outdoor activities and are in southern England where the Lyme disease vector  
8 *I. ricinus* is most prevalent.[1,5,40] The exposure risk from ticks is likely to be higher in these  
9 areas than other parts of the country. It is interesting that previously observed Lyme disease  
10 hotspots, such as Thetford Forest,[13] were not evident in the current study. This may be due  
11 to changing tick population dynamics and/or the prevalence of *B. burgdorferi s.l.* infection in  
12 host-seeking vectors, changing human behaviour, or the larger number of patients within this  
13 study population. It is also possible that awareness of Lyme disease is higher in these areas,  
14 and cases are successfully identified and managed in primary care without the need for  
15 serological diagnosis. Throughout the rest of England and Wales the incidence of confirmed  
16 Lyme disease cases remains relatively low (69.2% of resident postcode areas have an  
17 incidence of less than 1.0 per 100,000 population per year) compared to the majority of  
18 western Europe.[7] These data suggest that although *I. ricinus* ticks are widespread across  
19 England and Wales,[1] the proportion that carry *B. burgdorferi s.l.* is relatively low, and a  
20 higher prevalence may only exist in the tick populations in the localities highlighted. Several  
21 studies would appear to support this hypothesis,[41–43] but further work is needed to  
22 compare the incidence of human cases, abundance of ticks and prevalence of *B. burgdorferi*  
23 *s.l.* in ticks in the same geographic area. The areas with high incidence are predominantly rural  
24 and this is reflected in the results where the study population were disproportionately more  
25 rural compared to the national population. Information about case locality represented by  
26 PHE region is reflective of the case's referring hospital microbiology department rather than  
27  
28  
29  
30  
31  
32  
33  
34  
35  
36  
37  
38  
39  
40  
41  
42  
43  
44  
45  
46  
47  
48  
49  
50  
51  
52  
53  
54  
55  
56  
57  
58  
59  
60

1  
2  
3 the cases' residence, or location of exposure. In some instances, mainly in rural areas, this  
4  
5 hospital may be a significant distance from the abode of the patient. This figure therefore is  
6  
7 more reflective of the burden of Lyme disease on local microbiology departments.  
8  
9

10  
11 Information provided at postcode area level relates to the patient's home address, and not  
12  
13 necessarily to where the patient was bitten by a tick. Some patients are likely to have been  
14  
15 bitten outside their resident postcode area. The further the exposure from home, the larger  
16  
17 this spatial error will be. To date, no work has been done to quantify this error in the UK. The  
18  
19 smoothed map (Fig 3c) attempts to account for this and shows an area of high incidence in  
20  
21 southern-central England, centred around Southampton, Salisbury, and Weymouth and  
22  
23 extends further west than the raw incidence data. This map highlights theoretical Lyme  
24  
25 disease risk areas more accurately, as it accounts for the bite distance spatial error, and  
26  
27 should be the map used for targeting public health strategies. The observed strong  
28  
29 geographical clustering of positive cases (Fig 3d), suggests that patient residence postcode  
30  
31 does correlate to some extent with disease risk.  
32  
33  
34  
35  
36  
37  
38

39 This is the first time that a cohort of laboratory-confirmed Lyme disease cases across England  
40  
41 and Wales has been described in terms of the socioeconomic status of their residential  
42  
43 postcode area. The results suggest that patients in England diagnosed with Lyme disease are  
44  
45 more likely to live in areas which are more affluent, have high levels of employment and  
46  
47 education, have a higher quality of life, are less exposed to crime, but have issues with access  
48  
49 to housing and local services. This is in contrast to the classic income gradient of health,[18–  
50  
51 20] where the lower an individual's socioeconomic position the worse their health, but  
52  
53 supports previous socioeconomic analyses of Lyme disease in the USA.[22,23] This study has  
54  
55 not investigated why areas with higher socioeconomic status appear to correlate with a  
56  
57  
58  
59  
60

1  
2  
3 higher incidence of Lyme disease cases but it may reflect the type of leisure activities  
4 undertaken, available leisure time, access and attitudes to the countryside by this section of  
5 society.[44] Further research is needed to better define the population of cases diagnosed  
6 with Lyme disease and why there is an association with socioeconomic status.  
7  
8  
9  
10  
11

12  
13 The only negative association with Lyme disease in England was observed for the barriers to  
14 housing and services domain and is likely due to the rural nature of the areas with the highest  
15 incidence. Rural areas score poorly as the housing tends to be expensive in relation to income  
16 and houses are a greater distance from services such as hospitals, schools and post offices. It  
17 could be reflective of this population only accessing health care, and so needing serological  
18 diagnosis, once symptoms have progressed beyond the early stages of disease. The living  
19 environment deprivation domain is a mix of housing quality, air pollution and road traffic  
20 accidents, and it is unsurprising that no association with Lyme disease incidence was  
21 observed.  
22  
23  
24  
25  
26  
27  
28  
29  
30  
31  
32  
33  
34  
35

36 In Wales, there was a significant positive correlation between case counts and the WIMD  
37 domain scores. There were an increasing number of patients living in more affluent areas. The  
38 reasons for these differences are likely to be similar to the English study population.  
39  
40  
41  
42  
43

44 The main limitation of this study is the use of patient residence postcode area as a proxy both  
45 for the place where Lyme disease was acquired and the socioeconomic status of Lyme disease  
46 cases. It is unknown how representative the socioeconomic characteristics of a postcode are  
47 of individual cases. Clear socioeconomic and demographic trends and associations have been  
48 identified; however, these factors cannot be disentangled using the current datasets and so  
49 the degree of bias inherent in them is unknown. Future studies should be designed, where a  
50  
51  
52  
53  
54  
55  
56  
57  
58  
59  
60



1  
2  
3 multivariable model can be created to identify any interaction or confounding effects of the  
4  
5 variables under examination.  
6  
7

8  
9 Current guidance for Lyme disease state that an erythema migrans rash is pathognomonic  
10  
11 and further laboratory diagnostics are not required.[4] An unknown proportion of cases will  
12  
13 be clinically diagnosed and managed in early illness by primary care clinicians and will not  
14  
15 make it in to this dataset. Laboratory-confirmed figures will therefore underestimate the true  
16  
17 incidence of Lyme disease seen in the general population. Without surveillance of primary  
18  
19 care presentations, it will be hard to establish a more accurate incidence figure.  
20  
21  
22

23  
24 The majority of geographical data presented is reliant on case postcode data. Due to data  
25  
26 attrition only 56.6% of cases in our dataset contained this data. Data attrition may have  
27  
28 occurred in three ways; poor completion of the laboratory referral forms (something well  
29  
30 documented for health professionals[45]), the non-notifiable status of clinical Lyme disease  
31  
32 and the lack of statutory obligation to provide information about suspect cases, and the  
33  
34 indirect route by which clinical samples are submitted for testing. Lyme disease testing is  
35  
36 usually requested in primary care and samples are routed through hospital laboratories  
37  
38 before reaching RIPL. There is the potential that some cases are also missed due to some  
39  
40 laboratories (both private and public) performing their own diagnostic testing without  
41  
42 sending samples to RIPL, as a specialist diagnostic testing laboratory, for confirmation. Testing  
43  
44 rates may also vary in different geographies dependent upon Lyme disease awareness of  
45  
46 health care professionals.  
47  
48  
49  
50  
51  
52

53  
54 In this study it has been shown that laboratory-diagnosed Lyme disease cases in England and  
55  
56 Wales have a bimodal age distribution and male predisposition. Geographical clustering of  
57  
58 cases was seen in southern England and new insights into the socioeconomics of the resident  
59  
60

1  
2  
3 area of laboratory-confirmed Lyme disease patients were described. This study strengthens  
4 the knowledge base of Lyme disease by providing incidence maps which highlight areas where  
5 Lyme disease may place the highest burden on primary and secondary care and characterising  
6 the socio-demographics of Lyme disease cases. These data will facilitate improved public  
7 health interventions and messaging, disease surveillance, and patient management.  
8  
9  
10  
11  
12  
13  
14  
15  
16  
17  
18

19 **Acknowledgement:** This work uses data provided by patients and collected by the NHS as  
20 part of their care and support and would not have been possible without access to this data.  
21  
22 The NIHR recognises and values the role of patient data, securely accessed and stored, both  
23 in underpinning and leading to improvements in research and care.  
24  
25  
26  
27  
28

29 **Contributors:** J.T., R.C., R.V., A.D., and J.W. contributed to the design and implementation of  
30 the research. A.S., T.B., K.R., K.H., and J.W., provided the RIPL dataset and assisted in its  
31 cleaning. J.T. performed data analysis. J.T. and J.W. wrote the manuscript in consultation  
32 with K.R., K.H., R.C., R.V., A.D., T.B., and A.S.  
33  
34  
35  
36  
37  
38  
39

40 **Funding:** The research was funded by the National Institute for Health Research Health  
41 Protection Research Unit (NIHR HPRU) in Emerging and Zoonotic Infections at University of  
42 Liverpool in partnership with Public Health England (PHE), in collaboration with Liverpool  
43 School of Tropical Medicine. JT, RC, and AD are based at the University of Liverpool. TB, AS  
44 and JW are based at the PHE Rare and Imported Pathogens Laboratory, Porton Down. RV is  
45 based at PHE, Liverpool. KR and KH are based in the Emerging Infection and Zoonoses section  
46 at PHE. The views expressed are those of the authors and not necessarily those of the NHS,  
47 the NIHR, the Department of Health or Public Health England.  
48  
49  
50  
51  
52  
53  
54  
55  
56  
57  
58  
59  
60

1  
2  
3 **Competing Interests:** None declared.  
4  
5

6 **Patient consent:** Not required.  
7  
8

9 **Ethical approval:** No ethical approval was required as these data were collected for public  
10 health surveillance under The Health Protection Legislation (England) Guidance 2010.[46]  
11  
12  
13  
14  
15  
16

## 17 **References**

- 18  
19  
20  
21 1 Cull B, Pietzsch ME, Hansford KM, et al. Surveillance of British ticks: An overview of  
22 species records, host associations, and new records of *Ixodes ricinus* distribution.  
23 *Ticks Tick Borne Dis* 2018;9:605–14.  
24  
25  
26  
27  
28  
29 2 Steere AC, Strle F, Wormser GP, et al. Lyme borreliosis. *Nat Rev Dis Prim*  
30 2016;2:16090.  
31  
32  
33  
34  
35 3 Stanek G, Wormser GP, Gray J, et al. Lyme borreliosis. *Lancet* 2012;379:461–73.  
36  
37  
38 4 National Institute for Health and Care Excellence. Lyme disease NICE guideline  
39 [NG95]. 2018.<https://www.nice.org.uk/guidance/ng95> (accessed 23 Oct 2018).  
40  
41  
42  
43 5 Medlock JM, Leach SA. Effect of climate change on vector-borne disease risk in the  
44 UK. *Lancet Infect Dis* 2015;15:721–30.  
45  
46  
47  
48 6 van den Wijngaard CC, Hofhuis A, Simões M, et al. Surveillance perspective on Lyme  
49 borreliosis across the European Union and European Economic Area. *Euro Surveill*  
50 2017;22(27).  
51  
52  
53  
54  
55  
56 7 Sykes RA, Makiello P. An estimate of Lyme Borreliosis incidence in Western Europe. *J*  
57 *Public Health (Oxf)* 2016;39:74-81  
58  
59  
60

- 1  
2  
3 8 The Health Protection (Notification) Regulations 2010 (2010).  
4  
5  
6 9 Public Health England. Lyme borreliosis epidemiology and surveillance.  
7  
8  
9 2013. <https://www.gov.uk/government/publications/lyme-borreliosis-epidemiology/lyme-borreliosis-epidemiology-and-surveillance> (accessed 23 Oct  
10  
11  
12  
13 2018).  
14  
15  
16 10 Public Health England. Infection Report Volume 11 Number 6.  
17  
18  
19 2017. [https://www.gov.uk/government/uploads/system/uploads/attachment\\_data/file/593004/hpr0617\\_zoos.pdf](https://www.gov.uk/government/uploads/system/uploads/attachment_data/file/593004/hpr0617_zoos.pdf) (accessed 23 Oct 2018).  
20  
21  
22  
23  
24 11 Leeflang MM, Ang CW, Berkhout J, et al. The diagnostic accuracy of serological tests  
25  
26  
27 for Lyme borreliosis: a systematic review and meta-analysis. *BMC Infect Dis*  
28  
29 2016;16:140  
30  
31  
32 12 Dessau RB, van Dam AP, Fingerle V, et al. To test or not to test? Laboratory support  
33  
34  
35 for the diagnosis of Lyme borreliosis. *Clin Microbiol Infect* 2018;24(2):118-124.  
36  
37  
38 13 Smith R, O'Connell S, Palmer S. Lyme disease surveillance in England and Wales, 1986  
39  
40  
41 1998. *Emerg Infect Dis* 2000;6(4):404-7.  
42  
43  
44 14 Cooper L, Branagan-harris M, Tuson R, et al. Lyme disease and Bell's palsy: an  
45  
46  
47 epidemiological study of diagnosis and risk in England. *Br J Gen Pract*  
48  
49 2017;67(658):e329-e335.  
50  
51  
52 15 Sajanti E, Virtanen M, Helve O, et al. Lyme borreliosis in Finland in 1995-2014. *Emerg*  
53  
54  
55 *Infect Dis* 2017;23:128-1288.  
56  
57  
58 16 Eliassen KE, Berild D, Reiso H, et al. Incidence and antibiotic treatment of erythema  
59  
60 migrans in Norway 2005-2009. *Ticks Tick Borne Dis* 2016;8:1-8.

- 1  
2  
3 17 Rizzoli A, Hauffe HC, Carpi G, et al. Lyme borreliosis in Europe. *Euro Surveil*  
4  
5 2011;16(27)  
6  
7  
8  
9 18 Hosseinpoor AR, Stewart Williams JA, Itani L, et al. Socioeconomic inequality in  
10  
11 domains of health: results from the World Health Surveys. *BMC Public Health*  
12  
13 2012;12:198.  
14  
15  
16  
17 19 Pasqualini M, Lanari D, Minelli L, et al. Health and income inequalities in Europe:  
18  
19 What is the role of circumstances? *Econ Hum Biol* 2017;26:164–73.  
20  
21  
22 20 Marmot M, Friel S, Bell R, et al. Closing the gap in a generation: health equity through  
23  
24 action on the social determinants of health. *Lancet* 2008;372:1661–9.  
25  
26  
27  
28 21 Ratnapradipa D, McDaniel JT, Barger A. Social vulnerability and Lyme disease  
29  
30 incidence : A regional analysis of the United States, 2000–2014. *Epidemiol Biostat*  
31  
32 *Public Heal* 2017;14:1–12.  
33  
34  
35  
36 22 Jackson LE, Hilborn ED, Thomas JC. Towards landscape design guidelines for reducing  
37  
38 Lyme disease risk. *Int J Epidemiol* 2006;35:315–22.  
39  
40  
41  
42 23 Jackson LE, Levine JF, Hilborn ED. A comparison of analysis units for associating Lyme  
43  
44 disease with forest-edge habitat. *Community Ecol* 2006;7:189–97.  
45  
46  
47  
48 24 Public Health England. Zoonoses: UK annual reports.  
49  
50 2017.<https://www.gov.uk/government/publications/zoonoses-uk-annual-reports>  
51  
52 (accessed 23 Oct 2018).  
53  
54  
55 25 Lyme disease test request form.  
56  
57 2017.<https://www.gov.uk/government/publications/lyme-disease-test-request-form>  
58  
59  
60 (accessed 23 Oct 2018).

- 1  
2  
3 26 Office for National Statistics - People, population and community. 2018.  
4  
5  
6 <https://www.ons.gov.uk/peoplepopulationandcommunity>. (accessed 23 Oct 2018)  
7  
8  
9 27 Public Health England. Public Health England regions, local centres and emergency  
10  
11 contacts. 2015.[https://www.gov.uk/government/collections/contacts-public-health-](https://www.gov.uk/government/collections/contacts-public-health-england-regions-local-centres-and-emergency)  
12  
13 [england-regions-local-centres-and-emergency](https://www.gov.uk/government/collections/contacts-public-health-england-regions-local-centres-and-emergency) (accessed 23 Oct 2018).  
14  
15  
16 28 Dudani SA. The distance-weighted k-nearest-neighbor rule. *IEEE Trans Syst Man*  
17  
18 *Cybern* 1976;325–7.  
19  
20  
21  
22 29 Enas GG, Choi SC. Choice of the smoothing parameter and efficiency of k-nearest  
23  
24 neighbor classification. *Comput Math with Appl* 1986;12:235–44.  
25  
26  
27  
28 30 Cuzick J, Edwards R. Methods for investigating localized clustering of disease.  
29  
30 Clustering methods based on k nearest neighbour distributions. *IARC Sci Publ*  
31  
32 1996;135:53–67.  
33  
34  
35  
36 31 Anselin L. Local Indicators of Spatial Association—LISA. *Geogr Anal* 1995;27:93–115.  
37  
38  
39 32 Anselin L, Syabri I, Smirnov O. Visualizing multivariate spatial correlation with  
40  
41 dynamically linked windows. *New Tools for Spatial Data Analysis* 2002.  
42  
43  
44  
45 33 Gov.uk. English Indices of Deprivation 2015.  
46  
47 2015.<https://www.gov.uk/government/statistics/english-indices-of-deprivation-2015>  
48  
49 (accessed 23 Oct 2018).  
50  
51  
52 34 Welsh Government. Welsh Index of Multiple Deprivation.  
53  
54 2015.[http://gov.wales/statistics-and-research/welsh-index-multiple-](http://gov.wales/statistics-and-research/welsh-index-multiple-deprivation/?lang=en)  
55  
56 [deprivation/?lang=en](http://gov.wales/statistics-and-research/welsh-index-multiple-deprivation/?lang=en) (accessed 23 Oct 2018).  
57  
58  
59  
60

- 1  
2  
3 35 Gov.uk. 2011 Rural Urban Classification.  
4  
5 2013.<https://www.gov.uk/government/statistics/2011-rural-urban-classification>  
6  
7 (accessed 23 Oct 2018).  
8  
9  
10  
11 36 Tulloch JSP, McGinley L, Sanchez-Vizcaino F, et al. The passive surveillance of ticks  
12  
13 using companion animal electronic health records. *Epidemiol Infect* 2017;145:2020-  
14  
15 2029.  
16  
17  
18  
19 37 Medlock JM, Hansford KM, Bormane A, et al. Driving forces for changes in  
20  
21 geographical distribution of Ixodes ricinus ticks in Europe. *Parasit Vector* 2013;6:1.  
22  
23  
24  
25 38 Vandenesch A, Turbelin C, Couturier E, et al. Incidence and hospitalisation rates of  
26  
27 Lyme borreliosis, France, 2004 to 2012. *Euro Surveill* 2014;19(34)  
28  
29  
30  
31 39 Wang Y, Hunt K, Nazareth I, et al. Do men consult less than women? An analysis of  
32  
33 routinely collected UK general practice data. *BMJ Open* 2013;3:e003320.  
34  
35  
36 40 Abdullah S, Helps C, Tasker S, et al. Ticks infesting domestic dogs in the UK: a large-  
37  
38 scale surveillance programme. *Parasit Vectors* 2016;9:391.  
39  
40  
41  
42 41 Sorouri R, Ramazani A, Karami A, et al. Isolation and characterization of Borrelia  
43  
44 burgdorferi strains from Ixodes ricinus ticks in the southern England. *Bioimpacts*  
45  
46 2015;5:71–8.  
47  
48  
49  
50 42 Bettridge J, Renard M, Zhao F, et al. Distribution of Borrelia burgdorferi sensu lato in  
51  
52 Ixodes ricinus Populations Across Central Britain. *Vector Borne Zoonotic Dis*  
53  
54 2013;13:139-146.  
55  
56  
57  
58 43 Hansford KM, Fonville M, Gillingham EL, et al. Ticks and Borrelia in urban and peri-  
59  
60 urban green space habitats in a city in southern England. *Ticks Tick Borne Dis*

- 1  
2  
3 2017;8:353–61.  
4  
5  
6  
7 44 Curry N, Ravenscroft N. Countryside recreation provision in England : exploring a  
8  
9 demand-led approach. *Land Use Policy* 2001;18:281–91.  
10  
11  
12 45 Horner JS, Horner JW. Do doctors read forms? A one-year audit of medical certificates  
13  
14 submitted to a crematorium. *J R Soc Med* 1998;91:371–6.  
15  
16  
17 46 Department of Health. Health Protection Legislation (England) Guidance 2010.  
18  
19 [http://webarchive.nationalarchives.gov.uk/20130105053557/http://www.dh.gov.uk/](http://webarchive.nationalarchives.gov.uk/20130105053557/http://www.dh.gov.uk/prod_consum_dh/groups/dh_digitalassets/@dh/@en/@ps/documents/digitalasset/dh_114589.pdf)  
20  
21 [prod\\_consum\\_dh/groups/dh\\_digitalassets/@dh/@en/@ps/documents/digitalasset/d](http://webarchive.nationalarchives.gov.uk/20130105053557/http://www.dh.gov.uk/prod_consum_dh/groups/dh_digitalassets/@dh/@en/@ps/documents/digitalasset/dh_114589.pdf)  
22  
23 [h\\_114589.pdf](http://webarchive.nationalarchives.gov.uk/20130105053557/http://www.dh.gov.uk/prod_consum_dh/groups/dh_digitalassets/@dh/@en/@ps/documents/digitalasset/dh_114589.pdf) (accessed 23 Oct 2018).  
24  
25  
26  
27  
28  
29  
30  
31  
32  
33

### 34 **Figure Legends**

35  
36  
37 Figure 1 - The annual incidence of Lyme disease in England and Wales (2013 -2016), and the  
38  
39 number of cases per month.  
40  
41

42  
43 Figure 2 – Population demographics of laboratory-confirmed Lyme disease cases in England  
44  
45 and Wales, 2013-2016. (Asterisks represent age bands with a significant difference  
46  
47 between genders. Male = Blue, Female = Red.)  
48  
49

50  
51 Figure 3 – The average incidence (cases per 100,000 per year) of laboratory-confirmed Lyme  
52  
53 disease in England and Wales (2013-16)  
54  
55

56 (A = Public Health England region and Wales (n = 3,985), B = Patient postcode area (n =  
57  
58 2,321), C = Smoothed patient postcode area, D = LISA map of significant incidence  
59  
60



1  
2  
3 clusters. Highest postcode areas and clusters are labelled accordingly; SO-  
4  
5 Southampton, SP-Salisbury, BH-Bournemouth, RG-Reading, DT-Dorchester, GU-  
6  
7 Guildford, TA-Taunton, TQ-Torquay, BN-Brighton, BA-Bath. Areas with no cases are  
8  
9 labelled in red; DA-Dartford, EC-Eastern Central London, HU-Hull, and WC-Western  
10  
11 Central London)  
12  
13  
14  
15

16 Figure 4 - Relationship between laboratory-confirmed Lyme disease case numbers (2013-  
17  
18 2016) in England and the English Indices of Deprivation 2015.  
19  
20  
21  
22  
23  
24  
25  
26  
27  
28  
29  
30  
31  
32  
33  
34  
35  
36  
37  
38  
39  
40  
41  
42  
43  
44  
45  
46  
47  
48  
49  
50  
51  
52  
53  
54  
55  
56  
57  
58  
59  
60

For peer review only

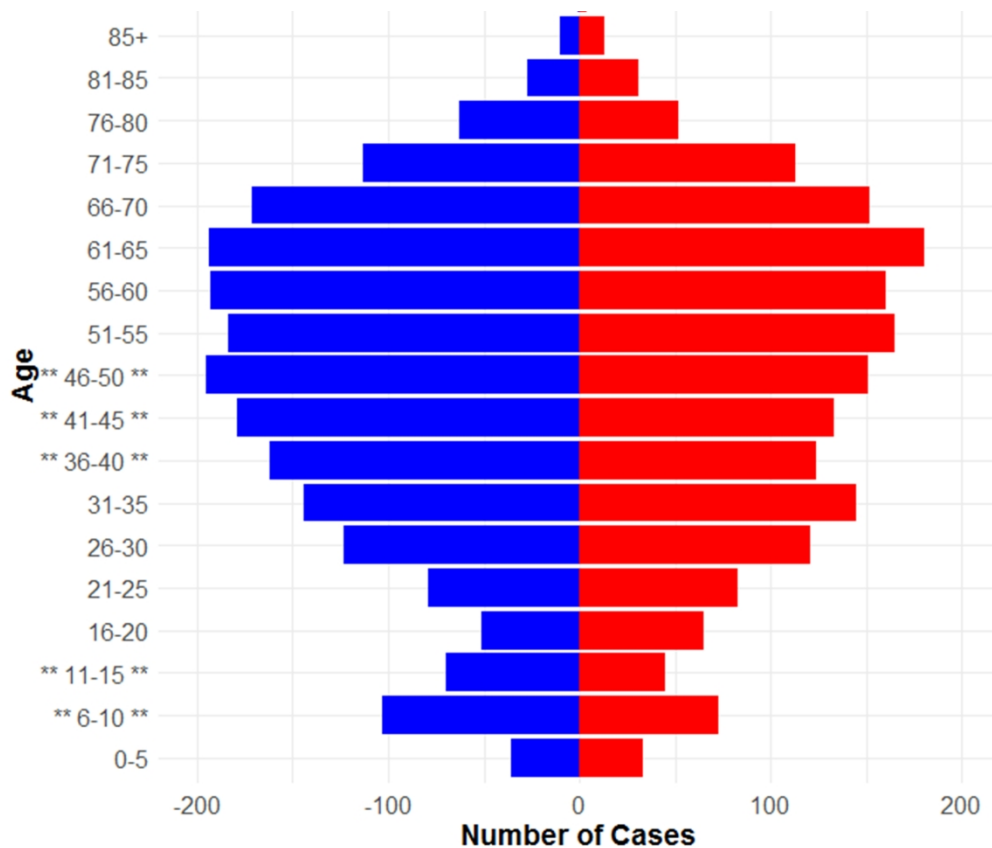

Figure 1 - The annual incidence of Lyme disease in England and Wales (2013 -2016), and the number of cases per month.

1116x939mm (96 x 96 DPI)

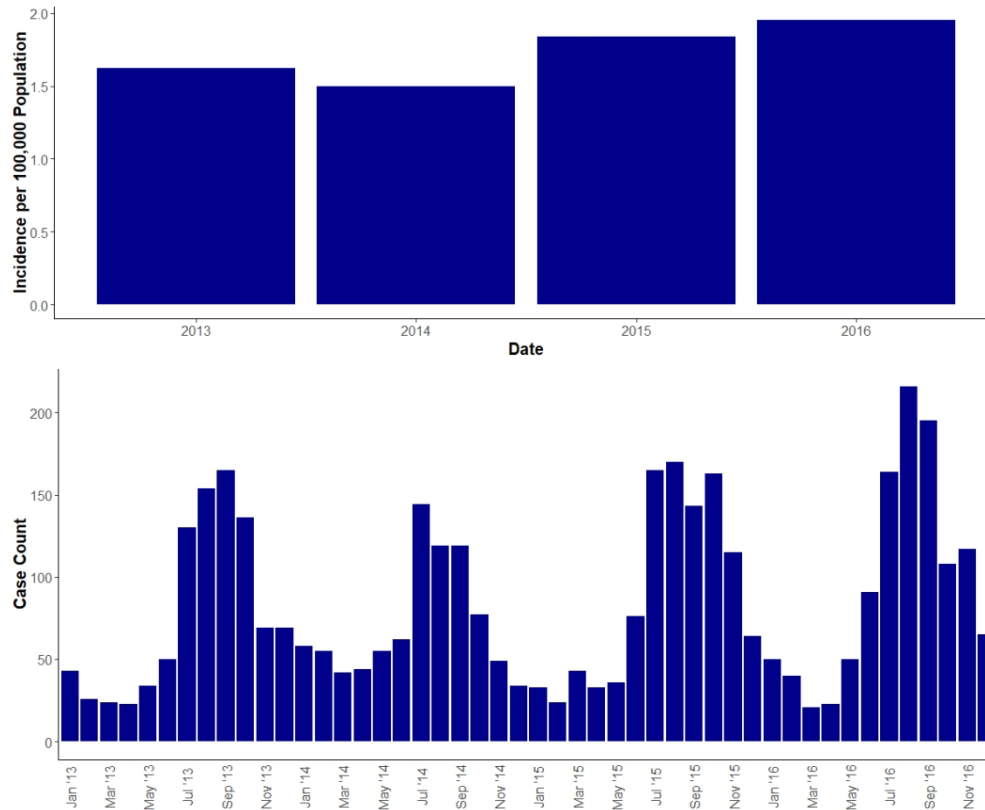

Figure 2 – Population demographics of laboratory-confirmed Lyme disease cases in England and Wales, 2013-2016. (Asterisks represent age bands with a significant difference between genders. Male = Blue, Female = Red.)

319x260mm (96 x 96 DPI)

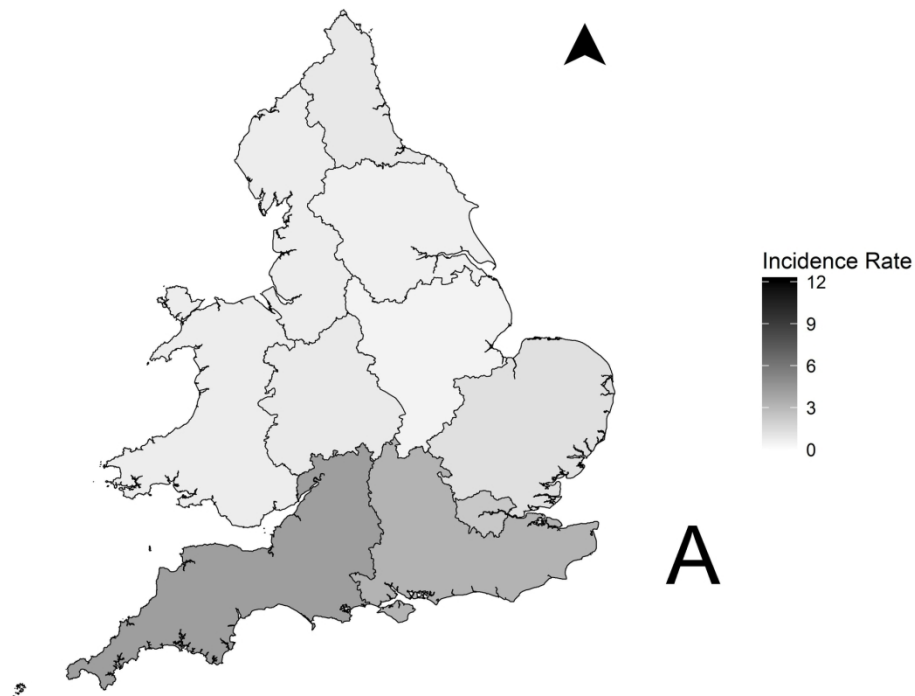

39 Figure 3 – The average incidence (cases per 100,000 per year) of laboratory-confirmed Lyme disease in  
40 England and Wales (2013-16) (A = Public Health England region and Wales (n = 3,985), B = Patient  
41 postcode area (n = 2,321), C = Smoothed patient postcode area, D = LISA map of significant incidence  
42 clusters. Highest postcode areas and clusters are labelled accordingly; SO-Southampton, SP-Salisbury, BH-  
43 Bournemouth, RG-Reading, DT-Dorchester, GU-Guildford, TA-Taunton, TQ-Torquay, BN-Brighton, BA-Bath.  
44 Areas with no cases are labelled in red; DA-Dartford, EC-Eastern Central London, HU-Hull, and WC-Western  
45 Central London)

46 172x172mm (300 x 300 DPI)

47  
48  
49  
50  
51  
52  
53  
54  
55  
56  
57  
58  
59  
60

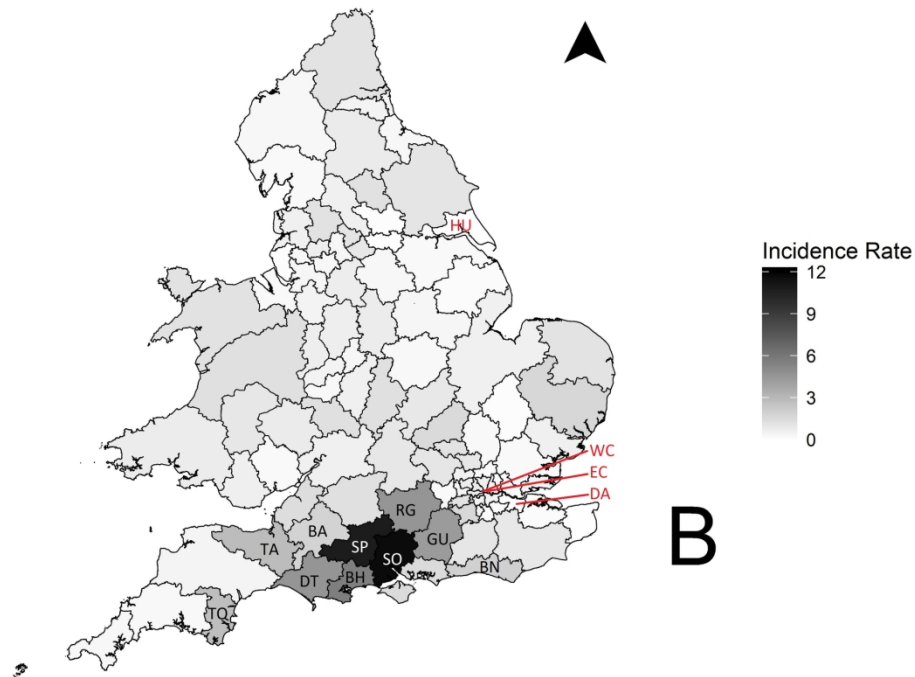

39 Figure 3 – The average incidence (cases per 100,000 per year) of laboratory-confirmed Lyme disease in  
40 England and Wales (2013-16) (A = Public Health England region and Wales (n = 3,985), B = Patient  
41 postcode area (n = 2,321), C = Smoothed patient postcode area, D = LISA map of significant incidence  
42 clusters. Highest postcode areas and clusters are labelled accordingly; SO-Southampton, SP-Salisbury, BH-  
43 Bournemouth, RG-Reading, DT-Dorchester, GU-Guildford, TA-Taunton, TQ-Torquay, BN-Brighton, BA-Bath.  
44 Areas with no cases are labelled in red; DA-Dartford, EC-Eastern Central London, HU-Hull, and WC-Western  
45 Central London)

46 172x172mm (300 x 300 DPI)

47  
48  
49  
50  
51  
52  
53  
54  
55  
56  
57  
58  
59  
60

1  
2  
3  
4  
5  
6  
7  
8  
9  
10  
11  
12  
13  
14  
15  
16  
17  
18  
19  
20  
21  
22  
23  
24  
25  
26  
27  
28  
29  
30  
31  
32  
33  
34  
35  
36  
37  
38  
39  
40  
41  
42  
43  
44  
45  
46  
47  
48  
49  
50  
51  
52  
53  
54  
55  
56  
57  
58  
59  
60

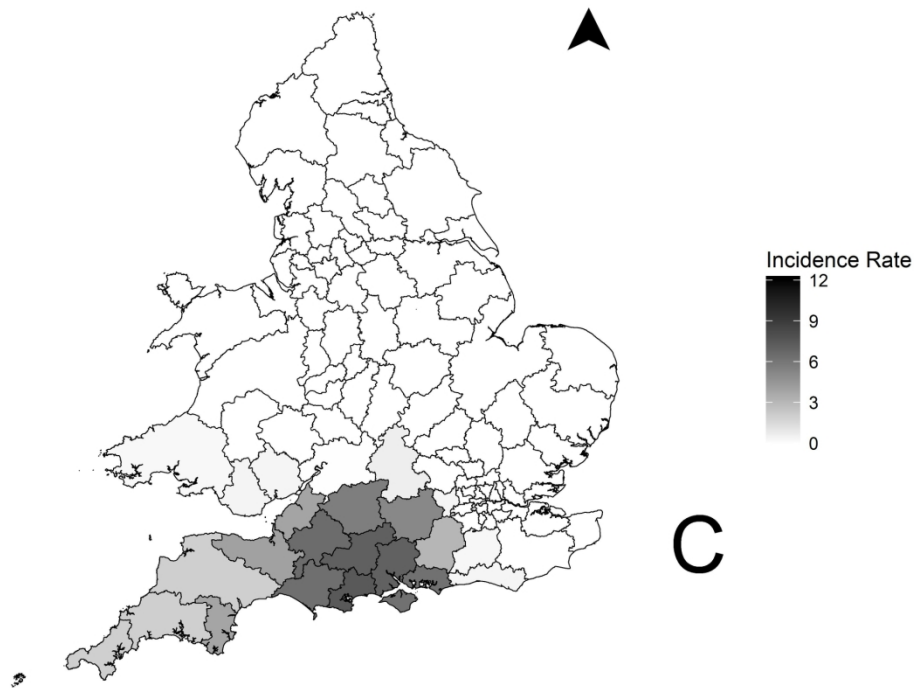

Figure 3 – The average incidence (cases per 100,000 per year) of laboratory-confirmed Lyme disease in England and Wales (2013-16) (A = Public Health England region and Wales (n = 3,985), B = Patient postcode area (n = 2,321), C = Smoothed patient postcode area, D = LISA map of significant incidence clusters. Highest postcode areas and clusters are labelled accordingly; SO-Southampton, SP-Salisbury, BH-Bournemouth, RG-Reading, DT-Dorchester, GU-Guildford, TA-Taunton, TQ-Torquay, BN-Brighton, BA-Bath. Areas with no cases are labelled in red; DA-Dartford, EC-Eastern Central London, HU-Hull, and WC-Western Central London)

177x177mm (300 x 300 DPI)

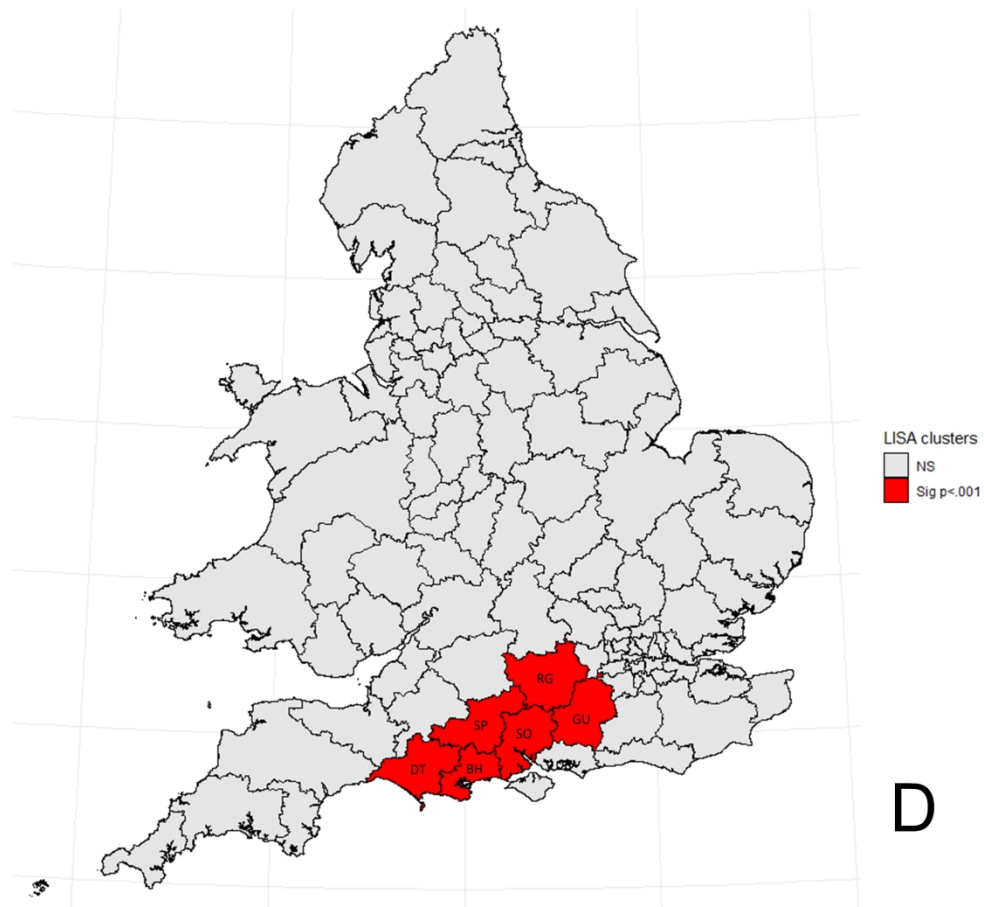

36 Figure 3 – The average incidence (cases per 100,000 per year) of laboratory-confirmed Lyme disease in  
 37 England and Wales (2013-16)

38 (A = Public Health England region and Wales (n = 3,985), B = Patient postcode area (n = 2,321), C =  
 39 Smoothed patient postcode area, D = LISA map of significant incidence clusters. Highest postcode areas and  
 40 clusters are labelled accordingly; SO-Southampton, SP-Salisbury, BH-Bournemouth, RG-Reading, DT-  
 41 Dorchester, GU-Guildford, TA-Taunton, TQ-Torquay, BN-Brighton, BA-Bath. Areas with no cases are labelled  
 42 in red; DA-Dartford, EC-Eastern Central London, HU-Hull, and WC-Western Central London)

43  
44  
45  
46  
47  
48  
49  
50  
51  
52  
53  
54  
55  
56  
57  
58  
59  
60

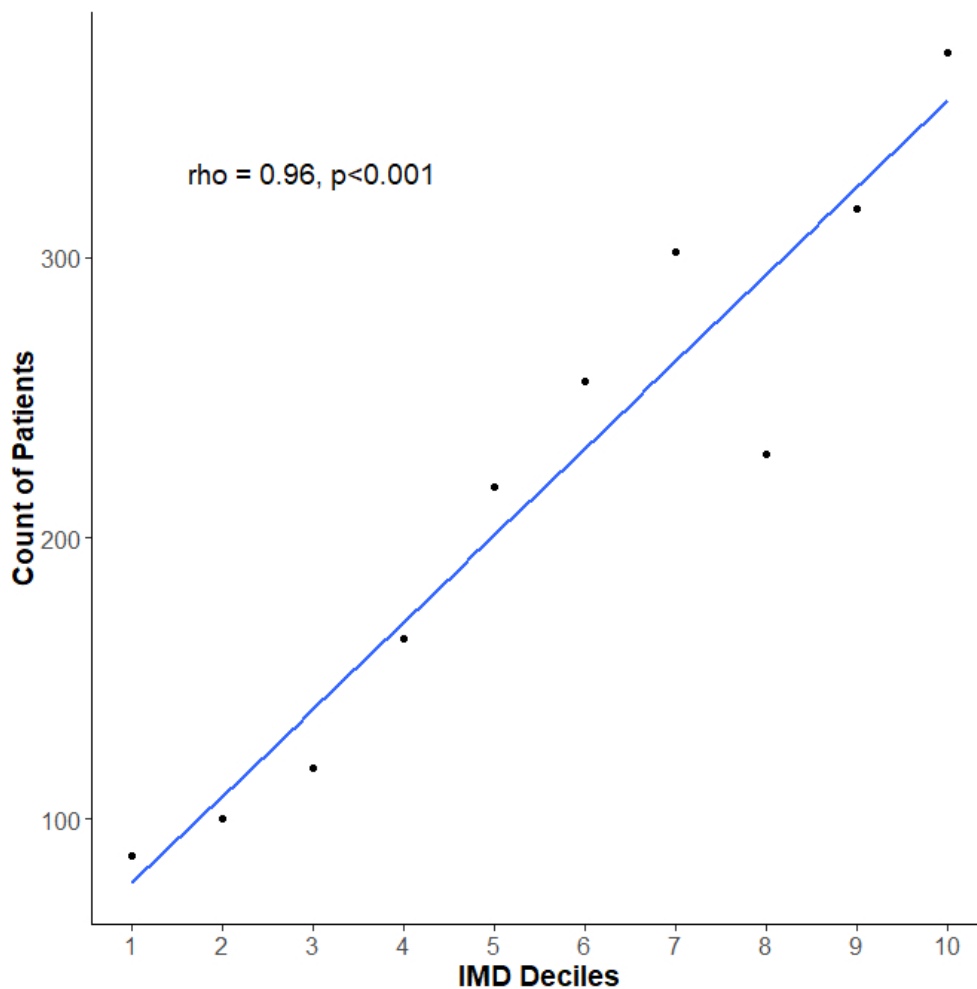

Figure 4 - Relationship between laboratory-confirmed Lyme disease case numbers (2013-2016) in England and the English Indices of Deprivation 2015.

178x178mm (96 x 96 DPI)



### Supplementary Material 1

The English Indices of Deprivation (EID) ranks 32,844 geographies (Lower super output areas) containing between 1000 and 3000 population and groups these in to deciles where 1 represents the areas with the highest levels of deprivation and 10 the lowest. The Welsh Index of Multiple Deprivation (WIMD) is ranked in a similar manner but is then grouped into the following categories; the 10% with the greatest deprivation, moving up through decreasing levels of deprivation in intervals from 10-20%, 20-30%, 30-50%, and the 50% least deprived areas. The EID and WIMD categorise each geographical area with a variety of deprivation domain scores to build a summary index figure (Supplementary Table 1).

Supplementary Table 1. Summary of the English Indices of Deprivation 2015[33] and Welsh Index of Multiple Deprivation[34] domains, and their weighting to calculate an Index of Multiple Deprivation

| English Indices of Deprivation (EID) Domain       | Description                                                                                                                            | Weighting for construction of Index of Multiple Deprivation (IMD)        |
|---------------------------------------------------|----------------------------------------------------------------------------------------------------------------------------------------|--------------------------------------------------------------------------|
| Income Deprivation Domain                         | Proportion of population experiencing deprivation due to low income                                                                    | 22.5%                                                                    |
| Employment Deprivation Domain                     | Proportion of working age population excluded from the labor market                                                                    | 22.5%                                                                    |
| Education, Skills and Training Deprivation Domain | Measures the lack of attainment and skills in the local population                                                                     | 13.5%                                                                    |
| Health Deprivation and Disability Domain          | Measures the risk of premature death and the impairment of quality of life through poor physical or mental health                      | 13.5%                                                                    |
| Crime Domain                                      | Measures the risk of personal and material victimisation at local level                                                                | 9.3%                                                                     |
| Barriers to Housing and Services Domain           | Measures the physical and financial accessibility of housing and local services (schools, supermarkets, primary care and post offices) | 9.3%                                                                     |
| Living Environment Deprivation Domain             | Measures the quality of the local environment (housing, air quality and road traffic accidents)                                        | 9.3%                                                                     |
| <b>Index of Multiple Deprivation (IMD)</b>        | <b>Overall measure of deprivation constructed by the weighted sum of the above domains</b>                                             |                                                                          |
| Welsh Index of Multiple Deprivation (WIMD) Domain | Description                                                                                                                            | Weighting for construction of Welsh Index of Multiple Deprivation (WIMD) |
| Income Domain                                     | Proportion of population experiencing deprivation due to low income                                                                    | 23.5%                                                                    |
| Employment Domain                                 | Proportion of working age population excluded from the labor market                                                                    | 23.5%                                                                    |
| Health Domain                                     | Measures the lack of good health                                                                                                       | 14.0%                                                                    |
| Education Domain                                  | Measures the extent of deprivation relating to education, training and skills                                                          | 14.0%                                                                    |
| Access to Services Domain                         | Measures deprivation due to a house holds inability to access services considered necessary for day to day living.                     | 10.0%                                                                    |
| Community Safety Domain                           | Measures deprivation relating to living in a safe community                                                                            | 5.0%                                                                     |
| Physical Environment Domain                       | Measures factors in the local area that may impact on wellbeing or quality of life                                                     | 5.0%                                                                     |
| Housing Domain                                    | Measures deprivation through lack of adequate housing                                                                                  | 5.0%                                                                     |
| <b>Welsh Index of Multiple Deprivation (WIMD)</b> | <b>Overall measure of deprivation constructed by the weighted sum of the above domains</b>                                             |                                                                          |

**Supplementary Material 2**

Supplementary Figure - Relationship between laboratory-confirmed Lyme disease case numbers (2013-2016) in England and the component measures of the English Indices of Deprivation 2015.

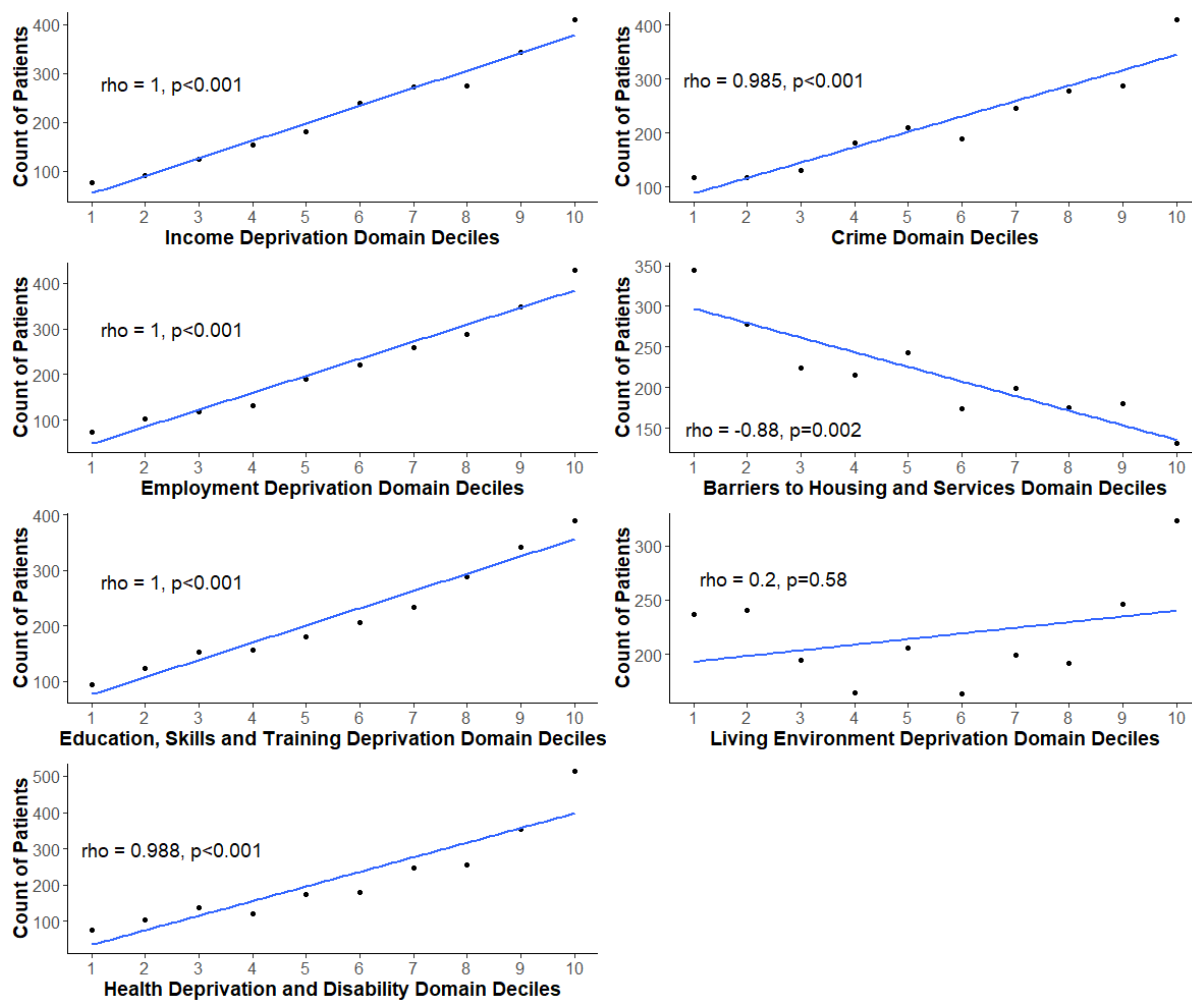

**STROBE 2007 (v4) checklist of items to be included in reports of observational studies in epidemiology\***  
**Checklist for cohort, case-control, and cross-sectional studies (combined)**

| Section/Topic             | Item # | Recommendation                                                                                                                                                                                                                                                                                                                                                                                                                                                         | Reported on page # |
|---------------------------|--------|------------------------------------------------------------------------------------------------------------------------------------------------------------------------------------------------------------------------------------------------------------------------------------------------------------------------------------------------------------------------------------------------------------------------------------------------------------------------|--------------------|
| Title and abstract        | 1      | (a) Indicate the study's design with a commonly used term in the title or the abstract                                                                                                                                                                                                                                                                                                                                                                                 | 2                  |
|                           |        | (b) Provide in the abstract an informative and balanced summary of what was done and what was found                                                                                                                                                                                                                                                                                                                                                                    | 2                  |
| <b>Introduction</b>       |        |                                                                                                                                                                                                                                                                                                                                                                                                                                                                        |                    |
| Background/rationale      | 2      | Explain the scientific background and rationale for the investigation being reported                                                                                                                                                                                                                                                                                                                                                                                   | 4-6                |
| Objectives                | 3      | State specific objectives, including any pre-specified hypotheses                                                                                                                                                                                                                                                                                                                                                                                                      | 6                  |
| <b>Methods</b>            |        |                                                                                                                                                                                                                                                                                                                                                                                                                                                                        |                    |
| Study design              | 4      | Present key elements of study design early in the paper                                                                                                                                                                                                                                                                                                                                                                                                                | 6                  |
| Setting                   | 5      | Describe the setting, locations, and relevant dates, including periods of recruitment, exposure, follow-up, and data collection                                                                                                                                                                                                                                                                                                                                        | 6                  |
| Participants              | 6      | (a) <i>Cohort study</i> —Give the eligibility criteria, and the sources and methods of selection of participants. Describe methods of follow-up<br><i>Case-control study</i> —Give the eligibility criteria, and the sources and methods of case ascertainment and control selection. Give the rationale for the choice of cases and controls<br><i>Cross-sectional study</i> —Give the eligibility criteria, and the sources and methods of selection of participants | 6                  |
|                           |        | (b) <i>Cohort study</i> —For matched studies, give matching criteria and number of exposed and unexposed<br><i>Case-control study</i> —For matched studies, give matching criteria and the number of controls per case                                                                                                                                                                                                                                                 | N/A                |
| Variables                 | 7      | Clearly define all outcomes, exposures, predictors, potential confounders, and effect modifiers. Give diagnostic criteria, if applicable                                                                                                                                                                                                                                                                                                                               | 6-8                |
| Data sources/ measurement | 8*     | For each variable of interest, give sources of data and details of methods of assessment (measurement). Describe comparability of assessment methods if there is more than one group                                                                                                                                                                                                                                                                                   | 6-8                |
| Bias                      | 9      | Describe any efforts to address potential sources of bias                                                                                                                                                                                                                                                                                                                                                                                                              | N/A                |
| Study size                | 10     | Explain how the study size was arrived at                                                                                                                                                                                                                                                                                                                                                                                                                              | 6                  |
| Quantitative variables    | 11     | Explain how quantitative variables were handled in the analyses. If applicable, describe which groupings were chosen and why                                                                                                                                                                                                                                                                                                                                           | 6-8                |
| Statistical methods       | 12     | (a) Describe all statistical methods, including those used to control for confounding                                                                                                                                                                                                                                                                                                                                                                                  | 6-8                |
|                           |        | (b) Describe any methods used to examine subgroups and interactions                                                                                                                                                                                                                                                                                                                                                                                                    | N/A                |
|                           |        | (c) Explain how missing data were addressed                                                                                                                                                                                                                                                                                                                                                                                                                            | N/A                |
|                           |        | (d) <i>Cohort study</i> —If applicable, explain how loss to follow-up was addressed<br><i>Case-control study</i> —If applicable, explain how matching of cases and controls was addressed                                                                                                                                                                                                                                                                              | N/A                |

|                          |     |                                                                                                                                                                                                              |       |
|--------------------------|-----|--------------------------------------------------------------------------------------------------------------------------------------------------------------------------------------------------------------|-------|
|                          |     | <i>Cross-sectional study</i> —If applicable, describe analytical methods taking account of sampling strategy                                                                                                 |       |
|                          |     | (e) Describe any sensitivity analyses                                                                                                                                                                        | N/A   |
| <b>Results</b>           |     |                                                                                                                                                                                                              |       |
| Participants             | 13* | (a) Report numbers of individuals at each stage of study—eg numbers potentially eligible, examined for eligibility, confirmed eligible, included in the study, completing follow-up, and analysed            | 8     |
|                          |     | (b) Give reasons for non-participation at each stage                                                                                                                                                         | N/A   |
|                          |     | (c) Consider use of a flow diagram                                                                                                                                                                           | N/A   |
| Descriptive data         | 14* | (a) Give characteristics of study participants (eg demographic, clinical, social) and information on exposures and potential confounders                                                                     | 8-10  |
|                          |     | (b) Indicate number of participants with missing data for each variable of interest                                                                                                                          | 8-10  |
|                          |     | (c) <i>Cohort study</i> —Summarise follow-up time (eg, average and total amount)                                                                                                                             | N/A   |
| Outcome data             | 15* | <i>Cohort study</i> —Report numbers of outcome events or summary measures over time                                                                                                                          | N/A   |
|                          |     | <i>Case-control study</i> —Report numbers in each exposure category, or summary measures of exposure                                                                                                         | N/A   |
|                          |     | <i>Cross-sectional study</i> —Report numbers of outcome events or summary measures                                                                                                                           | 8-10  |
| Main results             | 16  | (a) Give unadjusted estimates and, if applicable, confounder-adjusted estimates and their precision (eg, 95% confidence interval). Make clear which confounders were adjusted for and why they were included | 8-10  |
|                          |     | (b) Report category boundaries when continuous variables were categorized                                                                                                                                    | 8-10  |
|                          |     | (c) If relevant, consider translating estimates of relative risk into absolute risk for a meaningful time period                                                                                             | N/A   |
| Other analyses           | 17  | Report other analyses done—eg analyses of subgroups and interactions, and sensitivity analyses                                                                                                               | 8-10  |
| <b>Discussion</b>        |     |                                                                                                                                                                                                              |       |
| Key results              | 18  | Summarise key results with reference to study objectives                                                                                                                                                     | 10-11 |
| Limitations              | 19  | Discuss limitations of the study, taking into account sources of potential bias or imprecision. Discuss both direction and magnitude of any potential bias                                                   | 14-15 |
| Interpretation           | 20  | Give a cautious overall interpretation of results considering objectives, limitations, multiplicity of analyses, results from similar studies, and other relevant evidence                                   | 15-16 |
| Generalisability         | 21  | Discuss the generalisability (external validity) of the study results                                                                                                                                        | 15-16 |
| <b>Other information</b> |     |                                                                                                                                                                                                              |       |
| Funding                  | 22  | Give the source of funding and the role of the funders for the present study and, if applicable, for the original study on which the present article is based                                                | 16    |

\*Give information separately for cases and controls in case-control studies and, if applicable, for exposed and unexposed groups in cohort and cross-sectional studies.

**Note:** An Explanation and Elaboration article discusses each checklist item and gives methodological background and published examples of transparent reporting. The STROBE checklist is best used in conjunction with this article (freely available on the Web sites of PLoS Medicine at <http://www.plosmedicine.org/>, Annals of Internal Medicine at <http://www.annals.org/>, and Epidemiology at <http://www.epidem.com/>). Information on the STROBE Initiative is available at [www.strobe-statement.org](http://www.strobe-statement.org).

# BMJ Open

## The demographics and geographic distribution of laboratory-confirmed Lyme disease cases in England and Wales (2013-2016): an ecological study

|                                 |                                                                                                                                                                                                                                                                                                                                                                                                                                                                                                                                                                                                                                                                                                                                                                                                                                                                                                                                                                                                                                                                                                                                                                                                                                                                                                                                           |
|---------------------------------|-------------------------------------------------------------------------------------------------------------------------------------------------------------------------------------------------------------------------------------------------------------------------------------------------------------------------------------------------------------------------------------------------------------------------------------------------------------------------------------------------------------------------------------------------------------------------------------------------------------------------------------------------------------------------------------------------------------------------------------------------------------------------------------------------------------------------------------------------------------------------------------------------------------------------------------------------------------------------------------------------------------------------------------------------------------------------------------------------------------------------------------------------------------------------------------------------------------------------------------------------------------------------------------------------------------------------------------------|
| Journal:                        | <i>BMJ Open</i>                                                                                                                                                                                                                                                                                                                                                                                                                                                                                                                                                                                                                                                                                                                                                                                                                                                                                                                                                                                                                                                                                                                                                                                                                                                                                                                           |
| Manuscript ID                   | bmjopen-2018-028064.R1                                                                                                                                                                                                                                                                                                                                                                                                                                                                                                                                                                                                                                                                                                                                                                                                                                                                                                                                                                                                                                                                                                                                                                                                                                                                                                                    |
| Article Type:                   | Research                                                                                                                                                                                                                                                                                                                                                                                                                                                                                                                                                                                                                                                                                                                                                                                                                                                                                                                                                                                                                                                                                                                                                                                                                                                                                                                                  |
| Date Submitted by the Author:   | 21-Jan-2019                                                                                                                                                                                                                                                                                                                                                                                                                                                                                                                                                                                                                                                                                                                                                                                                                                                                                                                                                                                                                                                                                                                                                                                                                                                                                                                               |
| Complete List of Authors:       | Tulloch, John; University of Liverpool, NIHR Health Protection Research Unit in Emerging and Zoonotic Infections; Public Health England<br>Semper, Amanda; Public Health England, NIHR Health Protection Research Unit in Emerging and Zoonotic Infections; Public Health England, Rare and Imported Pathogens Laboratory<br>Brooks, Tim; Public Health England, NIHR Health Protection Research Unit in Emerging and Zoonotic Infections; Public Health England, Rare and Imported Pathogens Laboratory<br>Russell, Katherine; Public Health England<br>Halsby, Kate; Public Health England<br>Christley, Robert; University of Liverpool, NIHR Health Protection Research Unit in Emerging and Zoonotic Infections; University of Liverpool, Institute of Infection and Global Health<br>Radford, Alan; University of Liverpool, NIHR Health Protection Research Unit in Emerging and Zoonotic Infections; University of Liverpool, Institute of Infection and Global Health<br>Vivancos, Roberto; Public Health England, Field Epidemiology Services; Public Health England, NIHR Health Protection Research Unit in Emerging and Zoonotic Infections<br>Warner, Jenny; Public Health England, NIHR Health Protection Research Unit in Emerging and Zoonotic Infections; Public Health England, Rare and Imported Pathogens Laboratory |
| <b>Primary Subject Heading</b>: | Epidemiology                                                                                                                                                                                                                                                                                                                                                                                                                                                                                                                                                                                                                                                                                                                                                                                                                                                                                                                                                                                                                                                                                                                                                                                                                                                                                                                              |
| Secondary Subject Heading:      | Infectious diseases, Public health                                                                                                                                                                                                                                                                                                                                                                                                                                                                                                                                                                                                                                                                                                                                                                                                                                                                                                                                                                                                                                                                                                                                                                                                                                                                                                        |
| Keywords:                       | Lyme disease, Lyme borreliosis, Epidemiology < INFECTIOUS DISEASES, England, surveillance, laboratory                                                                                                                                                                                                                                                                                                                                                                                                                                                                                                                                                                                                                                                                                                                                                                                                                                                                                                                                                                                                                                                                                                                                                                                                                                     |
|                                 |                                                                                                                                                                                                                                                                                                                                                                                                                                                                                                                                                                                                                                                                                                                                                                                                                                                                                                                                                                                                                                                                                                                                                                                                                                                                                                                                           |

SCHOLARONE™  
Manuscripts

1  
2  
3 **Title: The demographics and geographic distribution of laboratory-confirmed Lyme disease**  
4  
5 **cases in England and Wales (2013-2016): an ecological study**  
6  
7

8 **Authors:** John S.P. Tulloch<sup>1,2</sup>, Amanda E. Semper<sup>3,4</sup>, Tim J.G. Brooks<sup>3,4</sup>, Katherine Russell<sup>5</sup>,  
9  
10  
11 Kate D. Halsby<sup>5</sup>, Rob M. Christley<sup>1,6</sup>, Alan D. Radford<sup>1,6</sup>, Roberto Vivancos<sup>2,7</sup>, Jenny C.  
12  
13 Warner<sup>3,4</sup>  
14

- 15  
16 1. NIHR Health Protection Research Unit in Emerging and Zoonotic Infections,  
17  
18 University of Liverpool, L69 3GL, UK.  
19  
20  
21 2. Public Health England, Liverpool, L3 1DS, UK  
22  
23  
24 3. NIHR Health Protection Research Unit in Emerging and Zoonotic Infections, Public  
25  
26 Health England, Porton Down, SP4 0JQ, UK.  
27  
28  
29 4. Rare and Imported Pathogens Laboratory, Public Health England, Porton Down, SP4  
30  
31 0JQ, UK  
32  
33  
34 5. Public Health England, London, NW9 5EQ, UK  
35  
36  
37 6. Institute of Infection and Global Health, University of Liverpool, Liverpool, CH64 7TE,  
38  
39 UK  
40  
41  
42 7. NIHR Health Protection Research Unit in Emerging and Zoonotic Infections, Public  
43  
44 Health England, Liverpool, L3 1DS, UK.  
45  
46  
47

48 **Corresponding authors:** John Tulloch; [jtulloch@liverpool.ac.uk](mailto:jtulloch@liverpool.ac.uk); Public Health England,  
49  
50 Cunard Building, Water Street, Liverpool, L3 1DS, UK; +44 0344 225 0562  
51

52  
53 Jenny Warner; [jenny.warner@phe.gov.uk](mailto:jenny.warner@phe.gov.uk); Rare and Imported  
54  
55 Pathogens Laboratory, Public Health England, Porton Down, SP4 0JQ, UK; +44 01980 612899  
56  
57  
58  
59

60 **Word count:** 3571

1  
2  
3 **Title: The demographics and geographic distribution of laboratory-confirmed Lyme disease**  
4  
5 **cases in England and Wales; 2013-2016**  
6  
7

8  
9 **Abstract**  
10

11 **Objective:** Lyme disease is a tick-borne disease of increasing incidence and public concern  
12 across the Northern Hemisphere. However, the socio-demographics and geographic  
13 distribution of the population affected in England and Wales are poorly understood.  
14 Therefore, the proposed study was designed to describe the demographics and distribution  
15 of laboratory-confirmed cases of Lyme disease from a national testing laboratory.  
16  
17  
18  
19  
20  
21  
22  
23  
24

25 **Design:** An ecological study of routinely collected laboratory surveillance data  
26  
27

28 **Setting:** Public Health England's national Lyme disease testing laboratory.  
29  
30

31 **Participants:** 3,986 laboratory-confirmed cases of Lyme disease between 2013 and 2016.  
32  
33

34 **Results:** In England and Wales, the incidence of laboratory-confirmed Lyme disease rose  
35 significantly over the study period, from 1.62 cases per 100,000 in 2013 to 1.95 cases per  
36 100,000 in 2016. There was a bimodal age distribution (with peaks at 6-10 and 61-65 years  
37 age bands) with a predominance of male patients. A significant clustering of areas with high  
38 Lyme disease incidence was located in southern England. An association was found between  
39 disease incidence and socioeconomic status, based on the patient's resident postcode, with  
40 more cases found in less deprived areas. Cases were disproportionately found in rural areas  
41 compared to the national population distribution.  
42  
43  
44  
45  
46  
47  
48  
49  
50  
51  
52  
53

54 **Conclusions:** These results suggest that Lyme disease patients originate from areas with  
55 higher socioeconomic status and disproportionately in rural areas. Identification of the Lyme  
56  
57  
58  
59  
60



1  
2  
3 disease hotspots in southern England, alongside the socio-demographics described, will  
4  
5 enable a targeted approach to public health interventions and messages.  
6  
7

8  
9 **Keywords:** Lyme disease; Lyme borreliosis; epidemiology; England; Wales; surveillance;  
10  
11 laboratory  
12  
13

#### 14 **Strengths and limitations of this study**

- 17 • This study is based upon a national testing laboratory's figures and provides a much  
18 needed update on basic epidemiological information about Lyme disease in England  
19 and Wales.  
20  
21
- 22 • Data on the socio-economic status of Lyme disease cases is globally sparse; our  
23 findings will have implications for future public health awareness and intervention  
24 schemes and may offer new avenues for research.  
25  
26
- 27 • Lyme disease incidence maps have been produced to a high resolution and show  
28 significant clustering of disease; providing public health organisations with locales to  
29 target interventions.  
30  
31
- 32 • Geographical data, and associated variables, were based upon patient residence  
33 information rather than tick bite location.  
34  
35
- 36 • The study was of an ecological design and positive cases were compared to the  
37 national population, therefore no measures of risk or multivariable analysis of  
38 demographic variables were possible.  
39  
40  
41  
42  
43  
44  
45  
46  
47  
48  
49  
50  
51  
52  
53  
54  
55  
56  
57  
58  
59  
60

## Introduction

Lyme disease is an important zoonotic tick-borne disease caused by spirochaetes of the *Borrelia burgdorferi sensu lato* genospecies complex. It is spread through the bites of infected *Ixodes* ticks, in the United Kingdom (UK) primarily *Ixodes ricinus*.<sup>[1]</sup> Autochthonous cases are found solely in the northern hemisphere.<sup>[2,3]</sup> Most commonly, early infection presents with an erythema migrans rash, with associated generalised flu-like symptoms.<sup>[4]</sup> Neurological manifestations, such as facial nerve palsy, can occur as part of early disseminated infection.<sup>[2]</sup> The varied presentation of the disease and the potential of increased tick exposure risk due to the extension of tick habitats as a result of changes in land management, climate and human activity, has resulted in heightened awareness and surveillance by public health organisations.<sup>[5,6]</sup>

In Western Europe the population-weighted incidence has been estimated at 22.04 cases per 100,000 person-years.<sup>[7]</sup> In the UK, Lyme disease is not a notifiable disease, but laboratory-confirmed *Borrelia* spp. are notifiable causative organisms.<sup>[8]</sup> Public Health England (PHE) compiles data on laboratory-confirmed cases of Lyme disease in England and Wales, which show a rise in the national incidence of confirmed cases from 0.38 per 100,000 population in 1997<sup>[9]</sup> to 1.95 per 100,000 population in 2016.<sup>[10]</sup> Data on laboratory-confirmed cases are provided by the national diagnostic laboratory, the PHE Rare and Imported Pathogens Laboratory (RIPL), which provides specialist advice and diagnostics for Lyme disease to the National Health Service (NHS) in England and Wales. Laboratory testing is based on serological diagnosis using a combination of screening and confirmatory immunoassays in accordance with internationally accepted best practice for Lyme disease diagnosis.<sup>[4,11,12]</sup> The incidence of cases which do not require laboratory diagnostics is unknown. These cases are most likely

1  
2  
3 presented to and are clinically-diagnosed and managed solely within primary care, as  
4 recommended by The National Institute for Health and Care Excellence (NICE) guidelines.[4]  
5  
6

7  
8 Information regarding the demographics of Lyme disease cases in England and Wales is  
9 limited. Laboratory surveillance data published in 2000 describe an equal sex ratio at all ages,  
10 however, numbers were not provided and statistical comparison was not performed.[13]  
11  
12

13 They describe a bimodal age distribution with peaks in childhood and at 45-64 years old.  
14 Hospital admissions data investigating Lyme disease and Bell's palsy describe a similar  
15 bimodal distribution.[14] These findings are similar to other European countries.[15–17]  
16  
17

18 There is a sparsity of recent demographic data for Lyme disease in England and Wales. The  
19 geographic distribution of confirmed cases was last described in 2000.[13] They describe a  
20 tendency for cases in southern England, especially around the New Forest. However, this data  
21 may not reflect the current distribution of Lyme disease cases in England and Wales. More  
22 current data is urgently needed to enable targeted public health messaging and intervention  
23 strategies.  
24  
25  
26  
27  
28  
29  
30  
31  
32  
33  
34  
35  
36

37 Globally, the negative income and education gradient of health has helped shape public  
38 health strategy and policy.[18,19] As a person's position on the socioeconomic spectrum  
39 increases, so their likelihood of better health increases. Such potentially avoidable disparities  
40 in health has led to an increased focus on understanding the social determinants of health[20]  
41 and developing measures to address these. Work to explore the association between  
42 socioeconomic status and Lyme disease incidence is limited. In the United States of America  
43 (USA) persons were to found to be at greatest risk of Lyme disease if they lived in the highest  
44 or lowest socially vulnerable areas.[21] Two studies found a relationship between Lyme  
45 disease incidence and median annual household income, with incidence peaking at around  
46  
47  
48  
49  
50  
51  
52  
53  
54  
55  
56  
57  
58  
59  
60

1  
2  
3 80,000 USD.[22,23] However, a consistent relationship between the socioeconomic state of  
4  
5 an individual and their Lyme disease acquisition risk has yet to emerge. In particular, no in-  
6  
7 depth research has been performed in Europe investigating the socioeconomics of the Lyme  
8  
9 disease patient cohort.  
10  
11

12  
13 The aim of this study was to utilise information collected through routine surveillance in  
14  
15 England and Wales to describe the demographics and geographic distribution of laboratory-  
16  
17 confirmed Lyme disease cases over a four year period. Correlations between Lyme disease  
18  
19 incidence and socioeconomic indices were analysed, using patient residence postcode as a  
20  
21 proxy for individual patient characteristics. New insight will be provided into the key  
22  
23 demographic, geographical and social determinants of the Lyme disease patient population.  
24  
25 This would allow us to identify potentially at-risk populations, shape public health  
26  
27 interventions and assist in appropriate disease awareness.  
28  
29  
30  
31  
32

### 33 **Methods**

34  
35 A retrospective analysis was performed using data extracted from the PHE Rare and Imported  
36  
37 Pathogens Laboratory's (RIPL) laboratory information management system (LIMS), between  
38  
39 1<sup>st</sup> January 2013 and 31<sup>st</sup> December 2016, for laboratory-confirmed Lyme disease cases, the  
40  
41 same data as used for PHE's Zoonoses Report.[24] The RIPL LIMS contains information  
42  
43 provided on the Lyme disease referral form submitted at the time of sample submission and  
44  
45 any additional information provided by clinicians during case follow up and management.[25]  
46  
47 The form captures information on the age, gender, location, clinical symptoms and travel  
48  
49 history of the patient. Data were cleaned and duplicate (across all variable) records were  
50  
51 removed where necessary.  
52  
53  
54  
55  
56  
57  
58  
59  
60

1  
2  
3 Annual Lyme disease incidence estimates were calculated, using the Office for National  
4  
5  
6  
7  
8  
9  
10  
11  
12  
13  
14  
15  
16  
17  
18  
19  
20  
21  
22  
23  
24  
25  
26  
27  
28  
29  
30  
31  
32  
33  
34  
35  
36  
37  
38  
39  
40  
41  
42  
43  
44  
45  
46  
47  
48  
49  
50  
51  
52  
53  
54  
55  
56  
57  
58  
59  
60

Annual Lyme disease incidence estimates were calculated, using the Office for National Statistics (ONS) mid-year population estimates as the denominator population.[26] A Chi-squared test for trend and a Chi-squared test for departure from the trend were used to analyse trends in incidence. Cases were stratified by age and gender. Using binomial tests, the null hypothesis that there was no difference in case numbers between males and females was tested within differing age bands, and overall.

Geographical information was collated based on (1) the regional origin of a diagnostic sample (usually a hospital microbiology department) consisting of eight PHE regions, and Wales as a whole,[27] and (2) the postcode area of the patient. These were used to calculate average annual incidence for the study period. To account for the unknown distance between a patient's home address and where they were bitten and to highlight any disease hotspots, the disease incidence map for postcode area was smoothed. A k-nearest neighbours (k-NN) approach was used.[28–30] In this approach, a Queen contiguity was used to define geographical neighbours, this defines a neighbour as being an area that shares a common edge or vertex. k is defined as the number of neighbours used for smoothing. k is equal to the square root of the total number of discrete geographical areas rounded to the nearest whole odd number (i.e. 105 postcode areas, its square root being 10.2, therefore k=11). Exploratory spatial data analysis (EDSA)[31,32] was used to explore the spatial autocorrelation of the postcode area incidence map. Global and local Moran's I values were calculated, and a LISA (Local Indicators of Spatial Association) significance map constructed to highlight any significant clusters. In both the k-NN smoothing and Moran's I calculations, a queen adjacency matrix was used.

1  
2  
3 Patient postcode was linked to ONS socioeconomic data,[26] enabling a description of the  
4 socioeconomic characteristics of the population in which a Lyme disease case was resident. If  
5  
6 socioeconomic characteristics of the population in which a Lyme disease case was resident. If  
7  
8 no patient postcode was recorded, these cases were excluded from the analysis.  
9  
10 Socioeconomic status is reported through the English Indices of Deprivation (EID) 2015[33]  
11 and the Welsh Index of Multiple Deprivation (WIMD) 2014[34] (Supplementary Material 1,  
12  
13 Table 1). Postcode area case count data were matched independently to the EID and WIMD,  
14  
15 and a rural urban classification. As EID and WIMD are on a discrete ordinal scale, Spearman's  
16  
17 rank correlation was used to calculate the correlation between the number of cases and  
18  
19 deprivation score. The proportion of cases with their home addresses located in either a rural  
20  
21 or urban area, were compared to the national rural urban classification from the ONS.[35]  
22  
23 This was performed using a Chi-squared test of independence for both English and Welsh  
24  
25 data.  
26  
27  
28  
29  
30  
31  
32

33 All statistical and spatial analyses were carried out using R language (version 3.2.0) (R Core  
34  
35 Team 2015). Results were deemed significant where  $p < 0.05$ .  
36  
37  
38

### 39 **Patient and public involvement**

40  
41 The public or patients were not involved in the development of the research question or the  
42  
43 outcome measures. However, this research was informed by the research recommendations  
44  
45 in the 2018 Lyme disease NICE guidelines,[4] which had patient and public involvement.  
46  
47 Investigators have and will continue to present these findings at regional and national events  
48  
49 and to the general public, patients groups, NHS organisations, public health departments and  
50  
51 governments agencies.  
52  
53  
54  
55  
56

### 57 **Results**

1  
2  
3 In total 3,986 unique cases, 3,893 cases in England and 93 in Wales, meeting a serological  
4 diagnosis of Lyme disease were identified in the RIPL LIMS between 1<sup>st</sup> January 2013 and the  
5  
6 31<sup>st</sup> December 2016. Of these, 98.7% (n=3,935) had complete records for date of submission,  
7  
8  
9  
10 gender and age. Only 10.5% (n=417) of cases had details on the submission form confirming  
11  
12 or excluding international travel from a case's clinical history. Due to the low completeness  
13  
14 of this variable, it was concluded that further analysis of travel history would not be  
15  
16 performed.  
17  
18

19  
20  
21 The annual incidence of laboratory-confirmed Lyme disease cases in England and Wales rose  
22  
23 from 1.62 per 100,000 population in 2013, to 1.95 in 2016. These figures are identical to PHE's  
24  
25 official incidence figures as they used the same data source.[10] There was evidence of an  
26  
27 overall association between incidence and year ( $\chi^2=43.13$ ,  $p<0.001$ ). This association took the  
28  
29 form of a trend with increasing incidence each year ( $\chi^2=30.17$ ,  $p<0.001$ ). Departures from the  
30  
31 trend were significant ( $\chi^2=43.1-30.1=12.96$ ,  $p<0.001$ ), as shown by the fall in incidence in  
32  
33 2014. There was marked seasonality, with the peak numbers of cases being diagnosed in the  
34  
35 summer months each year (Fig 1).  
36  
37  
38  
39

40  
41 Across all ages there were significantly more male (n=2,096) than female (n=1,839) cases ( $p <$   
42  
43 0.001), with a bimodal age distribution, with peaks at 6-10 and 61-65 year age bands (Fig 2).  
44  
45 Grouping the data in 5-year age bands, there were significantly more men than women in the  
46  
47 6-10 ( $p=0.03$ ), 11-15 ( $p=0.03$ ), 36-40 ( $p=0.01$ ), 41-45 ( $p=0.02$ ), and 46-50 ( $p=0.04$ ) age groups.  
48  
49  
50

51 Data were available about PHE regions for 99.9% (n=3,985) of the study population (Fig 3a).  
52  
53 The patient residence postcode was not provided on 1,665 of the referral forms, and  
54  
55 therefore only 58.2% (n=2,321) of cases could be described at postcode area resolution. The  
56  
57 average percentage of missing postcode data by PHE region was 31.9% (range: 10.8%-76.1%).  
58  
59 The regions with the highest missing postcode data were London (76.1%), South West  
60

1  
2  
3 (49.4%), and North West (44.7%). The regions with the lowest missing postcode data were  
4 Wales (10.8%), North East (12.1%), and West Midlands (14.5%). The South West PHE region  
5 had the highest incidence of Lyme disease in England and Wales; none of the PHE regions,  
6 nor Wales, reported zero cases. The postcode areas with the highest average annual  
7 incidence of Lyme disease were Southampton (11.65 cases per 100,000 per year), Salisbury  
8 (10.75), Bournemouth (5.62), Reading (4.59), Dorchester (4.57), Guildford (4.31), Taunton  
9 (2.79), Torquay (2.75), Brighton (1.96), and Bath (1.84) (Fig 3b). These areas are all in southern  
10 England. Only four postcode areas had no laboratory-confirmed cases in the four year  
11 surveillance period (Fig 3b), namely Dartford, Eastern Central London, Hull, and Western  
12 Central London. The smoothed data showed a trend for the areas of highest incidence to be  
13 located in southern-central England (Fig 3c). There was significant spatial autocorrelation, the  
14 global Moran's I was 0.564 ( $p=0.01$ ), indicating that postcode areas with similar incidence are  
15 clustered together. LISA mapping identified six areas as significant clusters of high incidence  
16 (Fig 3d); Southampton, Salisbury, Bournemouth, Reading, Dorchester, and Guildford (for all  
17  $p<0.001$ ).

18  
19  
20  
21  
22  
23  
24  
25  
26  
27  
28  
29  
30  
31 Using patient residence postcode data, it was possible to match 55.6% ( $n=2,165$ ) of English  
32 records to the English Indices of Deprivation and 98.2% ( $n=92$ ) of Welsh records to the Welsh  
33 Index of Multiple Deprivation (WIMD). An overall significant positive correlation between the  
34 number of cases and Index of Multiple Deprivation (IMD) decile was observed ( $p=0.96$ ,  
35  $p<0.001$ ), with more Lyme disease cases found in less deprived areas (Fig 4). This significant  
36 positive correlation was seen across all domains of deprivation, except the 'Barriers to  
37 Housing and Services Domain' where this trend was reversed ( $p=-0.88$ ,  $p=0.002$ ) and the  
38 'Living Environment Deprivation Domain' where there was no significant correlation ( $p=0.2$ ,  
39  $p=0.58$ ) (Supplementary material 2). An overall significant positive correlation between the  
40 number of cases and WIMD rank was observed ( $p=0.89$ ,  $p=0.04$ ), with more Lyme disease  
41 cases found in the least deprived areas.  
42  
43  
44  
45  
46  
47  
48  
49  
50  
51  
52  
53  
54  
55  
56  
57  
58  
59  
60



When compared to the national population, the study population was disproportionately more likely to live in a rural area, for both English ( $p<0.001$ ) and Welsh ( $p<0.001$ ) sections of the study population (Table 1).

Table 1 – The rural urban classification of laboratory-confirmed cases of Lyme disease in England and Wales (2013-2016) compared to the national census population

| Category | Percentage of English Study Population | Percentage of Welsh Study Population | Percentage of 2015 census population |
|----------|----------------------------------------|--------------------------------------|--------------------------------------|
| Rural    | 34.3% (n=743)                          | 47.8% (n=44)                         | 17.9%                                |
| Urban    | 65.7% (n=1,422)                        | 52.2% (n=48)                         | 82.1%                                |

## Discussion

Between 2013 and 2016 there was a significant increase in annual incidence of cases of confirmed Lyme disease, with a seasonality that matched previous publications and has been well documented.[9] The observed seasonality closely matches *I. ricinus* tick population dynamics in the UK, which annually peak around June and July.[1,36] Concerns have been raised about how the expansion of tick habitats due to changes in land use and management, and climate change, may be increasing the risk of Lyme disease infection.[5,37] Although the incidence of confirmed cases increased over the study period, there was significant deviation from the trend, most notably in 2014. The reasons behind this variable, but increasing, incidence of Lyme disease are likely to be multifactorial and may include raised public and practitioner awareness, variable weather patterns causing alterations in tick abundance and/or carriage of *B. burgdorferi s.l.*, and changes in human activity and behaviour.

This study observed a bimodal age distribution, with peaks at 6-10 and 61-65 years, and an overall predominance of males. This bimodal distribution has been reported in other

1  
2  
3 European countries,[15–17] and matches previous UK studies.[13,14] However, the  
4  
5 predominance of males in the current study population does not concur with other European  
6  
7 studies, where women are over-represented.[15–17] In the USA, Lyme disease is more  
8  
9 prevalent in males compared to females less than 60 years old, and equal or higher in women  
10  
11 above 60 than among men.[2] In contrast, more men were hospitalised in France due to Lyme  
12  
13 disease and more women were diagnosed by general practitioners.[38] Historically, in  
14  
15 England and Wales, Lyme disease incidence in men and women has been similar.[13,14] The  
16  
17 male predominance in this study may be due to the difference in health seeking behaviour  
18  
19 between genders, with women more likely to seek healthcare at early stages of illness.[39] By  
20  
21 presenting at later stages of Lyme disease, when pathognomonic signs may have waned, male  
22  
23 cases may require laboratory confirmation more frequently. Further work is needed to  
24  
25 establish the causes behind these gender differences and whether they are related to  
26  
27 environmental or behavioral risk factors, such as occupation, leisure activities, or differences  
28  
29 in health seeking behaviours.  
30  
31  
32  
33  
34  
35  
36  
37

38 There was geographical variation in Lyme disease incidence across patient residence postcode  
39  
40 area in England and Wales, based on 58.2% of laboratory-confirmed cases. The global Moran's  
41  
42 I statistic showed that there was significant positive spatial autocorrelation, and clusters of  
43  
44 high incidence were found in southern England. This area includes the New Forest National  
45  
46 Park, the South Downs National Park, Salisbury Plain, Cranborne Chase Area of Outstanding  
47  
48 Natural Beauty (AONB), Dorset AONB and Purbeck Heritage Coast. These are all popular  
49  
50 destinations for outdoor activities and are in southern England where the Lyme disease vector  
51  
52 *I. ricinus* is most prevalent.[1,5,40] The exposure risk from ticks is likely to be higher in these  
53  
54 areas than other parts of the country. It is interesting that previously observed Lyme disease  
55  
56 hotspots, such as Thetford Forest,[13] were not evident in the current study. This may be due  
57  
58  
59  
60

1  
2  
3 to changing tick population dynamics and/or the prevalence of *B. burgdorferi s.l.* infection in  
4  
5 host-seeking vectors, changing human behaviour, or the larger number of patients within this  
6  
7 study population. It is also possible that awareness of Lyme disease is higher in these areas,  
8  
9 and cases are successfully identified and managed in primary care without the need for  
10  
11 serological diagnosis. Throughout the rest of England and Wales the incidence of confirmed  
12  
13 Lyme disease cases remains relatively low (69.2% of resident postcode areas have an  
14  
15 incidence of less than 1.0 per 100,000 population per year) compared to the majority of  
16  
17 western Europe.[7] The four postcode areas with no laboratory-confirmed cases were all  
18  
19 surrounded by areas with very low incidence and is likely to be reflective of the overall low  
20  
21 incidence of Lyme disease in England and Wales. Although *I. ricinus* ticks are widespread  
22  
23 across England and Wales,[1] the risk of contracting Lyme disease appears to be relatively  
24  
25 low. It is possible that the tick populations found within high Lyme disease incidence areas  
26  
27 may also have the highest *B.burgdorferi s.l.* prevalence. Several studies would appear to  
28  
29 support this hypothesis,[41–43] but further work is needed to compare the incidence of  
30  
31 human cases, abundance of ticks and prevalence of *B. burgdorferi s.l.* in ticks in the same  
32  
33 geographic area. The areas with high incidence are predominantly rural and this is reflected  
34  
35 in the results where the study population were disproportionately more rural compared to  
36  
37 the national population. Information about case locality represented by PHE region is  
38  
39 reflective of the case's referring hospital microbiology department rather than the cases'  
40  
41 residence, or location of exposure. In some instances, mainly in rural areas, this hospital may  
42  
43 be a significant distance from the abode of the patient. This figure therefore is more reflective  
44  
45 of the burden of Lyme disease on local microbiology departments.  
46  
47  
48  
49  
50  
51  
52  
53  
54  
55

56  
57 Information provided at postcode area level relates to the patient's home address, and not  
58  
59 necessarily to where the patient was bitten by a tick. Some patients are likely to have been  
60

1  
2  
3 bitten outside their resident postcode area. The further the exposure from home, the larger  
4  
5 this spatial error will be. To date, no work has been done to quantify this error in the UK. The  
6  
7 smoothed map (Fig 3c) attempts to account for this and shows an area of high incidence in  
8  
9 southern-central England, centred around Southampton, Salisbury, and Weymouth and  
10  
11 extends further west than the raw incidence data. This map highlights theoretical Lyme  
12  
13 disease risk areas more accurately, as it accounts for the bite distance spatial error, and  
14  
15 should be the map used for targeting public health strategies. The observed strong  
16  
17 geographical clustering of positive cases (Fig 3d), suggests that patient residence postcode  
18  
19 does correlate to some extent with disease risk.  
20  
21  
22  
23  
24  
25

26 This is the first time that a cohort of laboratory-confirmed Lyme disease cases across England  
27  
28 and Wales has been described in terms of the socioeconomic status of their residential  
29  
30 postcode area. The results suggest that patients in England diagnosed with Lyme disease are  
31  
32 more likely to live in areas which are more affluent, have high levels of employment and  
33  
34 education, have a higher quality of life, are less exposed to crime, but have issues with access  
35  
36 to housing and local services. This is in contrast to the classic income gradient of health,[18–  
37  
38 20] where the lower an individual's socioeconomic position the worse their health, but  
39  
40 supports previous socioeconomic analyses of Lyme disease in the USA.[22,23] This study has  
41  
42 not investigated why areas with higher socioeconomic status appear to correlate with a  
43  
44 higher incidence of Lyme disease cases but it may reflect the type of leisure activities  
45  
46 undertaken, available leisure time, access and attitudes to the countryside by this section of  
47  
48 society.[44] Further research is needed to better define the population of cases diagnosed  
49  
50 with Lyme disease and why there is an association with socioeconomic status.  
51  
52  
53  
54  
55  
56  
57  
58  
59  
60

1  
2  
3 The only negative association with Lyme disease in England was observed for the barriers to  
4 housing and services domain and is likely due to the rural nature of the areas with the highest  
5 incidence. Rural areas score poorly as the housing tends to be expensive in relation to income  
6 and houses are a greater distance from services such as hospitals, schools and post offices. It  
7 could be reflective of this population only accessing health care, and so needing serological  
8 diagnosis, once symptoms have progressed beyond the early stages of disease. The living  
9 environment deprivation domain is a mix of housing quality, air pollution and road traffic  
10 accidents, and it is unsurprising that no association with Lyme disease incidence was  
11 observed.  
12  
13  
14  
15  
16  
17  
18  
19  
20  
21  
22  
23  
24  
25

26 In Wales, there was a significant positive correlation between case counts and the WIMD  
27 domain scores. There were an increasing number of patients living in more affluent areas. The  
28 reasons for these differences are likely to be similar to the English study population.  
29  
30  
31  
32  
33

34 The main limitation of this study is the use of patient residence postcode area as a proxy both  
35 for the place where Lyme disease was acquired and the socioeconomic status of Lyme disease  
36 cases. It is unknown how representative the socioeconomic characteristics of a postcode are  
37 of individual cases. Clear socioeconomic and demographic trends and associations have been  
38 identified; however, these factors cannot be disentangled using the current datasets and so  
39 the degree of bias inherent in them is unknown. Future studies should be designed, where a  
40 multivariable model can be created to identify any interaction or confounding effects of the  
41 variables under examination.  
42  
43  
44  
45  
46  
47  
48  
49  
50  
51  
52  
53

54 Current guidance for Lyme disease state that an erythema migrans rash is pathognomonic  
55 and further laboratory diagnostics are not required.[4] An unknown proportion of cases will  
56 be clinically diagnosed and managed in early illness by primary care clinicians and will not  
57  
58  
59  
60

1  
2  
3 make it in to this dataset. Laboratory-confirmed figures will therefore underestimate the true  
4  
5 incidence of Lyme disease seen in the general population. Without surveillance of primary  
6  
7 care presentations, it will be hard to establish a more accurate incidence figure.  
8  
9

10  
11 The majority of geographical data presented is reliant on case postcode data. Due to data  
12  
13 attrition only 58.2% of cases in our dataset contained this data. Data attrition may have  
14  
15 occurred in three ways; poor completion of the laboratory referral forms (something well  
16  
17 documented for health professionals[45]), the non-notifiable status of clinical Lyme disease  
18  
19 and the lack of statutory obligation to provide information about suspect cases, and the  
20  
21 indirect route by which clinical samples are submitted for testing. Lyme disease testing is  
22  
23 usually requested in primary care and samples are routed through hospital laboratories  
24  
25 before reaching RIPL. There is the potential that some cases are also missed due to some  
26  
27 laboratories (both private and public) performing their own diagnostic testing without  
28  
29 sending samples to RIPL, as a specialist diagnostic testing laboratory, for confirmation. Testing  
30  
31 rates may also vary in different geographies dependent upon Lyme disease awareness of  
32  
33 health care professionals. The results indicated that the degree of missingness was not even  
34  
35 across all PHE regions. This level of missingness had not been anticipated, and there is the  
36  
37 potential for bias within the results. It would be possible to extract missing geographical data  
38  
39 by linking cases to datasets with patient postcode data, via a unique patient identifier (NHS  
40  
41 Number). However, data linkage for this dataset was not possible as part of public health  
42  
43 surveillance under The Health Protection Legislation (England) Guidance 2010.[46] These  
44  
45 geographical results should be interpreted within the above context and with an appropriate  
46  
47 level of prudence.  
48  
49  
50  
51  
52  
53  
54  
55  
56  
57  
58  
59  
60

1  
2  
3 In this study it has been shown that laboratory-diagnosed Lyme disease cases in England and  
4  
5 Wales have a bimodal age distribution and male predisposition. Geographical clustering of  
6  
7 cases was seen in southern England and new insights into the socioeconomics of the resident  
8  
9 area of laboratory-confirmed Lyme disease patients were described. This study strengthens  
10  
11 the knowledge base of Lyme disease by providing incidence maps which highlight areas where  
12  
13 Lyme disease may place the highest burden on primary and secondary care and characterising  
14  
15 the socio-demographics of Lyme disease cases. These data will facilitate improved public  
16  
17 health interventions and messaging, disease surveillance, and patient management.  
18  
19  
20  
21  
22  
23  
24  
25

26  
27 **Acknowledgement:** This work uses data provided by patients and collected by the NHS as  
28  
29 part of their care and support and would not have been possible without access to this data.  
30  
31 The NIHR recognises and values the role of patient data, securely accessed and stored, both  
32  
33 in underpinning and leading to improvements in research and care.  
34  
35  
36

37  
38 **Contributors:** J.T., R.C., R.V., A.D., and J.W. contributed to the design and implementation of  
39  
40 the research. A.S., T.B., K.R., K.H., and J.W., provided the RIPL dataset and assisted in its  
41  
42 cleaning. J.T. performed data analysis. J.T. and J.W. wrote the manuscript in consultation  
43  
44 with K.R., K.H., R.C., R.V., A.D., T.B., and A.S.  
45  
46

47  
48 **Funding:** The research was funded by the National Institute for Health Research Health  
49  
50 Protection Research Unit (NIHR HPRU) in Emerging and Zoonotic Infections at University of  
51  
52 Liverpool in partnership with Public Health England (PHE), in collaboration with Liverpool  
53  
54 School of Tropical Medicine. JT, RC, and AD are based at the University of Liverpool. TB, AS  
55  
56 and JW are based at the PHE Rare and Imported Pathogens Laboratory, Porton Down. RV is  
57  
58 based at PHE, Liverpool. KR and KH are based in the Emerging Infection and Zoonoses section  
59  
60

1  
2  
3 at PHE. The views expressed are those of the authors and not necessarily those of the NHS,  
4  
5 the NIHR, the Department of Health or Public Health England.  
6  
7

8  
9 **Competing Interests:** None declared.  
10

11  
12 **Patient consent:** Not required.  
13

14  
15 **Ethical approval:** No ethical approval was required as these anonymised patient data were  
16  
17 collected for public health surveillance under The Health Protection Legislation (England)  
18  
19 Guidance 2010.[46]  
20  
21

22  
23 **Data sharing statement:** The data that support the findings of this study are available from  
24  
25 Public Health England, but restrictions apply to the availability of these data as they are not  
26  
27 publicly available. Aggregated data may be available from Public Health England on  
28  
29 reasonable request and with permission of Public Health England; subject to the  
30  
31 requirement of the General Data Protection Regulation.  
32  
33

## 34 35 36 **References**

- 37  
38  
39 1 Cull B, Pietzsch ME, Hansford KM, et al. Surveillance of British ticks: An overview of  
40  
41 species records, host associations, and new records of *Ixodes ricinus* distribution.  
42  
43 *Ticks Tick Borne Dis* 2018;9:605–14.  
44  
45  
46  
47 2 Steere AC, Strle F, Wormser GP, et al. Lyme borreliosis. *Nat Rev Dis Prim*  
48  
49 2016;2:16090.  
50  
51  
52 3 Stanek G, Wormser GP, Gray J, et al. Lyme borreliosis. *Lancet* 2012;379:461–73.  
53  
54  
55 4 National Institute for Health and Care Excellence. Lyme disease NICE guideline  
56  
57 [NG95]. 2018.<https://www.nice.org.uk/guidance/ng95> (accessed 23 Oct 2018).  
58  
59  
60



- 1  
2  
3 5 Medlock JM, Leach SA. Effect of climate change on vector-borne disease risk in the  
4  
5 UK. *Lancet Infect Dis* 2015;15:721–30.  
6  
7  
8  
9 6 van den Wijngaard CC, Hofhuis A, Simões M, et al. Surveillance perspective on Lyme  
10  
11 borreliosis across the European Union and European Economic Area. *Euro Surveill*  
12  
13 2017;22(27).  
14  
15  
16 7 Sykes RA, Makiello P. An estimate of Lyme Borreliosis incidence in Western Europe. *J*  
17  
18 *Public Health (Oxf)* 2016;39:74-81  
19  
20  
21  
22 8 The Health Protection (Notification) Regulations 2010 (2010).  
23  
24  
25 9 Public Health England. Lyme borreliosis epidemiology and surveillance.  
26  
27 2013. [https://www.gov.uk/government/publications/lyme-borreliosis-](https://www.gov.uk/government/publications/lyme-borreliosis-epidemiology/lyme-borreliosis-epidemiology-and-surveillance)  
28  
29 [epidemiology/lyme-borreliosis-epidemiology-and-surveillance](https://www.gov.uk/government/publications/lyme-borreliosis-epidemiology/lyme-borreliosis-epidemiology-and-surveillance) (accessed 23 Oct  
30  
31 2018).  
32  
33  
34  
35 10 Public Health England. Infection Report Volume 11 Number 6.  
36  
37 2017. [https://www.gov.uk/government/uploads/system/uploads/attachment\\_data/fil](https://www.gov.uk/government/uploads/system/uploads/attachment_data/file/593004/hpr0617_zoos.pdf)  
38  
39 [e/593004/hpr0617\\_zoos.pdf](https://www.gov.uk/government/uploads/system/uploads/attachment_data/file/593004/hpr0617_zoos.pdf) (accessed 23 Oct 2018).  
40  
41  
42  
43 11 Leeflang MM, Ang CW, Berkhout J, et al. The diagnostic accuracy of serological tests  
44  
45 for Lyme borreliosis: a systematic review and meta-analysis. *BMC Infect Dis*  
46  
47 2016;16:140  
48  
49  
50  
51 12 Dessau RB, van Dam AP, Fingerle V, et al. To test or not to test? Laboratory support  
52  
53 for the diagnosis of Lyme borreliosis. *Clin Microbiol Infect* 2018;24(2):118-124.  
54  
55  
56  
57 13 Smith R, O'Connell S, Palmer S. Lyme disease surveillance in England and Wales, 1986  
58  
59 1998. *Emerg Infect Dis* 2000;6(4):404–7.  
60

- 1  
2  
3 14 Cooper L, Branagan-harris M, Tuson R, et al. Lyme disease and Bell's palsy: an  
4 epidemiological study of diagnosis and risk in England. *Br J Gen Pract*  
5  
6 2017;67(658):e329-e335.  
7  
8  
9  
10  
11 15 Sajanti E, Virtanen M, Helve O, et al. Lyme borreliosis in Finland in 1995-2014. *Emerg*  
12  
13 *Infect Dis* 2017;23:128–1288.  
14  
15  
16 16 Eliassen KE, Berild D, Reiso H, et al. Incidence and antibiotic treatment of erythema  
17  
18 migrans in Norway 2005–2009. *Ticks Tick Borne Dis* 2016;8:1-8.  
19  
20  
21  
22 23 Rizzoli A, Hauffe HC, Carpi G, et al. Lyme borreliosis in Europe. *Euro Surveil*  
24  
25 2011;16(27)  
26  
27  
28 29 Hosseinpoor AR, Stewart Williams JA, Itani L, et al. Socioeconomic inequality in  
30  
31 domains of health: results from the World Health Surveys. *BMC Public Health*  
32  
33 2012;12:198.  
34  
35  
36 37 Pasqualini M, Lanari D, Minelli L, et al. Health and income inequalities in Europe:  
38  
39 What is the role of circumstances? *Econ Hum Biol* 2017;26:164–73.  
40  
41  
42 43 Marmot M, Friel S, Bell R, et al. Closing the gap in a generation: health equity through  
44  
45 action on the social determinants of health. *Lancet* 2008;372:1661–9.  
46  
47  
48 49 Ratnapradipa D, McDaniel JT, Barger A. Social vulnerability and Lyme disease  
50  
51 incidence : A regional analysis of the United States, 2000-2014. *Epidemiol Biostat*  
52  
53 *Public Heal* 2017;14:1–12.  
54  
55  
56 57 22 Jackson LE, Hilborn ED, Thomas JC. Towards landscape design guidelines for reducing  
58  
59 Lyme disease risk. *Int J Epidemiol* 2006;35:315–22.  
60

- 1  
2  
3 23 Jackson LE, Levine JF, Hilborn ED. A comparison of analysis units for associating Lyme  
4 disease with forest-edge habitat. *Community Ecol* 2006;7:189–97.  
5  
6  
7  
8  
9 24 Public Health England. Zoonoses: UK annual reports.  
10  
11 2017.<https://www.gov.uk/government/publications/zoonoses-uk-annual-reports>  
12  
13 (accessed 23 Oct 2018).  
14  
15  
16  
17 25 Lyme disease test request form.  
18  
19 2017.<https://www.gov.uk/government/publications/lyme-disease-test-request-form>  
20  
21 (accessed 23 Oct 2018).  
22  
23  
24  
25 26 Office for National Statistics - People, population and community. 2018.  
26  
27 <https://www.ons.gov.uk/peoplepopulationandcommunity>. (accessed 23 Oct 2018)  
28  
29  
30 27 Public Health England. Public Health England regions, local centres and emergency  
31 contacts. 2015.[https://www.gov.uk/government/collections/contacts-public-health-](https://www.gov.uk/government/collections/contacts-public-health-england-regions-local-centres-and-emergency)  
32  
33 [england-regions-local-centres-and-emergency](https://www.gov.uk/government/collections/contacts-public-health-england-regions-local-centres-and-emergency) (accessed 23 Oct 2018).  
34  
35  
36  
37  
38 28 Dudani SA. The distance-weighted k-nearest-neighbor rule. *IEEE Trans Syst Man*  
39  
40 *Cybern* 1976;325–7.  
41  
42  
43  
44 29 Enas GG, Choi SC. Choice of the smoothing parameter and efficiency of k-nearest  
45  
46 neighbor classification. *Comput Math with Appl* 1986;12:235–44.  
47  
48  
49  
50 30 Cuzick J, Edwards R. Methods for investigating localized clustering of disease.  
51  
52 Clustering methods based on k nearest neighbour distributions. *IARC Sci Publ*  
53  
54 1996;135:53–67.  
55  
56  
57  
58 31 Anselin L. Local Indicators of Spatial Association—LISA. *Geogr Anal* 1995;27:93–115.  
59  
60

- 1  
2  
3 32 Anselin L, Syabri I, Smirnov O. Visualizing multivariate spatial correlation with  
4 dynamically linked windows. *New Tools for Spatial Data Analysis* 2002.  
5  
6  
7  
8  
9 33 Gov.uk. English Indices of Deprivation 2015.  
10  
11 2015.<https://www.gov.uk/government/statistics/english-indices-of-deprivation-2015>  
12  
13 (accessed 23 Oct 2018).  
14  
15  
16  
17 34 Welsh Government. Welsh Index of Multiple Deprivation.  
18  
19 2015.[http://gov.wales/statistics-and-research/welsh-index-multiple-](http://gov.wales/statistics-and-research/welsh-index-multiple-deprivation/?lang=en)  
20  
21 deprivation/?lang=en (accessed 23 Oct 2018).  
22  
23  
24  
25 35 Gov.uk. 2011 Rural Urban Classification.  
26  
27 2013.<https://www.gov.uk/government/statistics/2011-rural-urban-classification>  
28  
29 (accessed 23 Oct 2018).  
30  
31  
32  
33 36 Tulloch JSP, McGinley L, Sanchez-Vizcaino F, et al. The passive surveillance of ticks  
34 using companion animal electronic health records. *Epidemiol Infect* 2017;145:2020-  
35 2029.  
36  
37  
38  
39  
40  
41 37 Medlock JM, Hansford KM, Bormane A, et al. Driving forces for changes in  
42 geographical distribution of *Ixodes ricinus* ticks in Europe. *Parasit Vector* 2013;6:1.  
43  
44  
45  
46 38 Vandenesch A, Turbelin C, Couturier E, et al. Incidence and hospitalisation rates of  
47 Lyme borreliosis, France, 2004 to 2012. *Euro Surveill* 2014;19(34)  
48  
49  
50  
51  
52 39 Wang Y, Hunt K, Nazareth I, et al. Do men consult less than women? An analysis of  
53 routinely collected UK general practice data. *BMJ Open* 2013;3:e003320.  
54  
55  
56  
57 40 Abdullah S, Helps C, Tasker S, et al. Ticks infesting domestic dogs in the UK: a large-  
58 scale surveillance programme. *Parasit Vectors* 2016;9:391.  
59  
60

- 1  
2  
3 41 Sorouri R, Ramazani A, Karami A, et al. Isolation and characterization of *Borrelia*  
4 burgdorferi strains from *Ixodes ricinus* ticks in the southern England. *Bioimpacts*  
5 2015;5:71–8.  
6  
7  
8  
9  
10  
11 42 Bettridge J, Renard M, Zhao F, et al. Distribution of *Borrelia burgdorferi sensu lato* in  
12 *Ixodes ricinus* Populations Across Central Britain. *Vector Borne Zoonotic Dis*  
13 2013;13:139-146.  
14  
15  
16  
17  
18  
19 43 Hansford KM, Fonville M, Gillingham EL, et al. Ticks and *Borrelia* in urban and peri-  
20 urban green space habitats in a city in southern England. *Ticks Tick Borne Dis*  
21 2017;8:353–61.  
22  
23  
24  
25  
26  
27 44 Curry N, Ravenscroft N. Countryside recreation provision in England : exploring a  
28 demand-led approach. *Land Use Policy* 2001;18:281–91.  
29  
30  
31  
32  
33 45 Horner JS, Horner JW. Do doctors read forms? A one-year audit of medical certificates  
34 submitted to a crematorium. *J R Soc Med* 1998;91:371–6.  
35  
36  
37  
38 46 Department of Health. Health Protection Legislation (England) Guidance 2010.  
39 [http://webarchive.nationalarchives.gov.uk/20130105053557/http://www.dh.gov.uk/  
40 prod\\_consum\\_dh/groups/dh\\_digitalassets/@dh/@en/@ps/documents/digitalasset/d  
41 h\\_114589.pdf](http://webarchive.nationalarchives.gov.uk/20130105053557/http://www.dh.gov.uk/prod_consum_dh/groups/dh_digitalassets/@dh/@en/@ps/documents/digitalasset/dh_114589.pdf) (accessed 23 Oct 2018).  
42  
43  
44  
45  
46  
47  
48  
49  
50  
51  
52  
53  
54

## 55 Figure Legends

56  
57  
58 Figure 1 - The annual incidence of Lyme disease in England and Wales (2013 -2016), and the  
59  
60

1  
2  
3 number of cases per month.  
4  
5

6 Figure 2 – Population demographics of laboratory-confirmed Lyme disease cases in England  
7  
8 and Wales, 2013-2016. (Asterisks represent age bands with a significant difference  
9  
10 between genders. Male = Blue, Female = Red.)  
11  
12

13  
14 Figure 3 – The average incidence (cases per 100,000 per year) of laboratory-confirmed Lyme  
15  
16 disease in England and Wales (2013-16)  
17

18  
19 (A = Public Health England region and Wales (n = 3,985), B = Patient postcode area (n =  
20  
21 2,321), C = Smoothed patient postcode area, D = LISA map of significant incidence  
22  
23 clusters. Highest postcode areas and clusters are labelled accordingly; SO-  
24  
25 Southampton, SP-Salisbury, BH-Bournemouth, RG-Reading, DT-Dorchester, GU-  
26  
27 Guildford, TA-Taunton, TQ-Torquay, BN-Brighton, BA-Bath. Areas with no cases are  
28  
29 labelled in red; DA-Dartford, EC-Eastern Central London, HU-Hull, and WC-Western  
30  
31 Central London)  
32  
33  
34  
35  
36

37 Figure 4 - Relationship between laboratory-confirmed Lyme disease case numbers (2013-  
38  
39 2016) in England and the English Indices of Deprivation 2015.  
40  
41  
42

#### 43 **License Statement**

44  
45 I, the Submitting Author has the right to grant and does grant on behalf of all authors of the  
46  
47 Work (as defined in the below author licence), an exclusive licence and/or a non-exclusive  
48  
49 licence for contributions from authors who are: i) UK Crown employees; ii) where BMJ has  
50  
51 agreed a CC-BY licence shall apply, and/or iii) in accordance with the terms applicable for US  
52  
53 Federal Government officers or employees acting as part of their official duties; on a  
54  
55 worldwide, perpetual, irrevocable, royalty-free basis to BMJ Publishing Group Ltd (“BMJ”) its  
56  
57  
58  
59  
60

1  
2  
3 licensees and where the relevant Journal is co-owned by BMJ to the co-owners of the  
4  
5 Journal, to publish the Work in BMJ Open and any other BMJ products and to exploit all  
6  
7 rights, as set out in our licence.  
8  
9

10  
11  
12  
13 The Submitting Author accepts and understands that any supply made under these terms is  
14  
15 made by BMJ to the Submitting Author unless you are acting as an employee on behalf of  
16  
17 your employer or a postgraduate student of an affiliated institution which is paying any  
18  
19 applicable article publishing charge (“APC”) for Open Access articles. Where the Submitting  
20  
21 Author wishes to make the Work available on an Open Access basis (and intends to pay the  
22  
23 relevant APC), the terms of reuse of such Open Access shall be governed by a Creative  
24  
25 Commons licence – details of these licences and which Creative Commons licence will apply  
26  
27 to this Work are set out in our licence referred to above.  
28  
29  
30  
31  
32  
33  
34  
35  
36  
37  
38  
39  
40  
41  
42  
43  
44  
45  
46  
47  
48  
49  
50  
51  
52  
53  
54  
55  
56  
57  
58  
59  
60



Figure 1 - The annual incidence of Lyme disease in England and Wales (2013 -2016), and the number of cases per month.

1116x939mm (96 x 96 DPI)



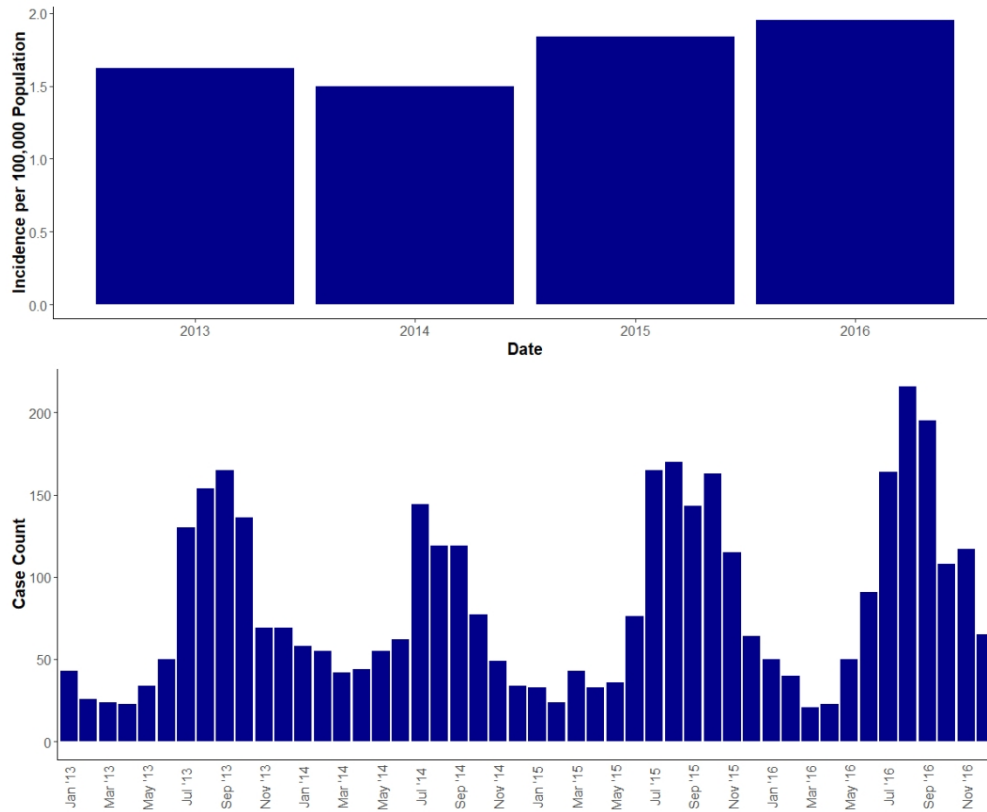

Figure 2 – Population demographics of laboratory-confirmed Lyme disease cases in England and Wales, 2013-2016. (Asterisks represent age bands with a significant difference between genders. Male = Blue, Female = Red.)

319x260mm (96 x 96 DPI)

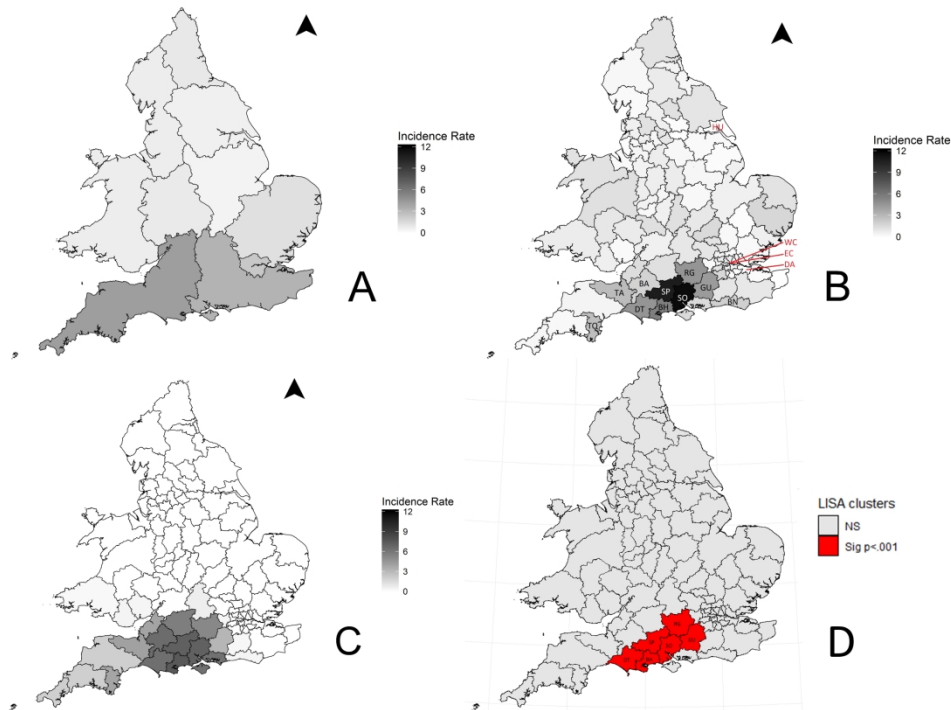

Figure 3 – The average incidence (cases per 100,000 per year) of laboratory-confirmed Lyme disease in England and Wales (2013-16) (A = Public Health England region and Wales (n = 3,985), B = Patient postcode area (n = 2,321), C = Smoothed patient postcode area, D = LISA map of significant incidence clusters. Highest postcode areas and clusters are labelled accordingly; SO-Southampton, SP-Salisbury, BH-Bournemouth, RG-Reading, DT-Dorchester, GU-Guildford, TA-Taunton, TQ-Torquay, BN-Brighton, BA-Bath. Areas with no cases are labelled in red; DA-Dartford, EC-Eastern Central London, HU-Hull, and WC-Western Central London)

527x381mm (150 x 150 DPI)

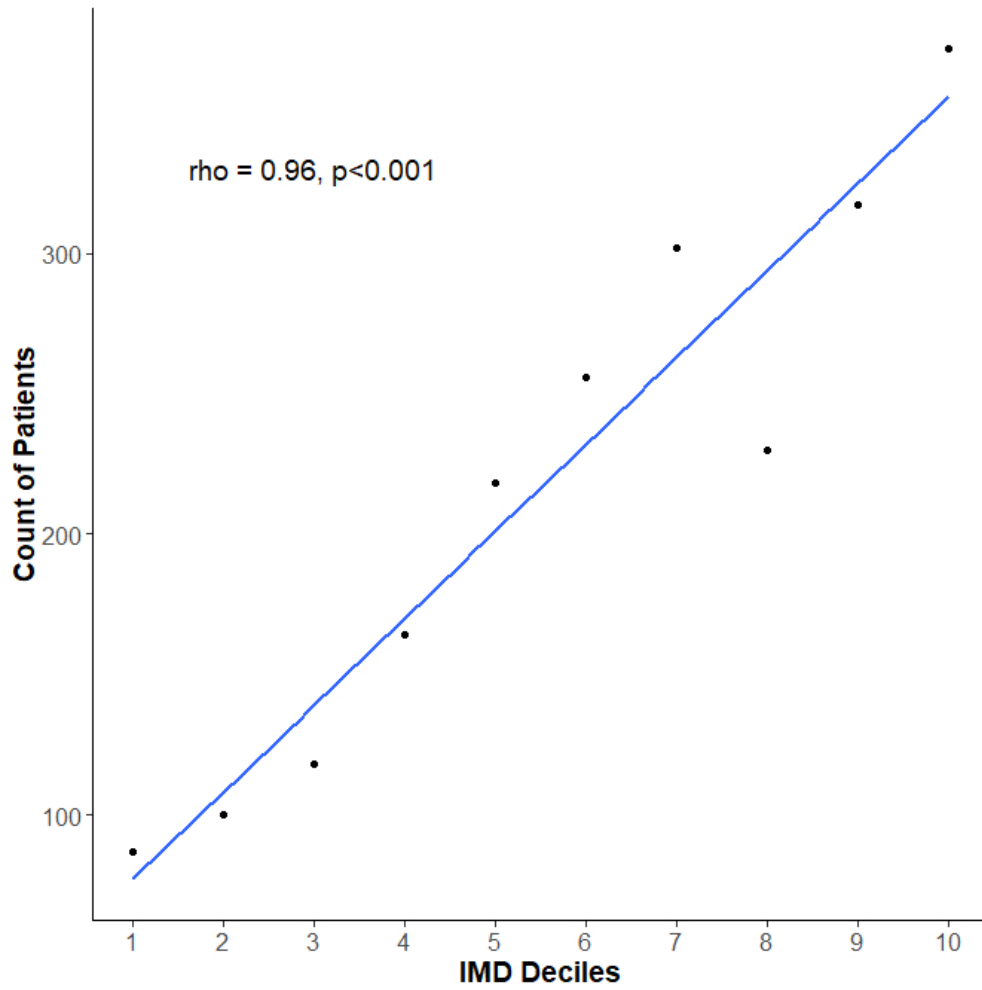

Figure 4 - Relationship between laboratory-confirmed Lyme disease case numbers (2013-2016) in England and the English Indices of Deprivation 2015.

178x178mm (96 x 96 DPI)

### Supplementary Material 1

The English Indices of Deprivation (EID) ranks 32,844 geographies (Lower super output areas) containing between 1000 and 3000 population and groups these in to deciles where 1 represents the areas with the highest levels of deprivation and 10 the lowest. The Welsh Index of Multiple Deprivation (WIMD) is ranked in a similar manner but is then grouped into the following categories; the 10% with the greatest deprivation, moving up through decreasing levels of deprivation in intervals from 10-20%, 20-30%, 30-50%, and the 50% least deprived areas. The EID and WIMD categorise each geographical area with a variety of deprivation domain scores to build a summary index figure (Supplementary Table 1).

Supplementary Table 1. Summary of the English Indices of Deprivation 2015[33] and Welsh Index of Multiple Deprivation[34] domains, and their weighting to calculate an Index of Multiple Deprivation

| English Indices of Deprivation (EID) Domain       | Description                                                                                                                            | Weighting for construction of Index of Multiple Deprivation (IMD)        |
|---------------------------------------------------|----------------------------------------------------------------------------------------------------------------------------------------|--------------------------------------------------------------------------|
| Income Deprivation Domain                         | Proportion of population experiencing deprivation due to low income                                                                    | 22.5%                                                                    |
| Employment Deprivation Domain                     | Proportion of working age population excluded from the labor market                                                                    | 22.5%                                                                    |
| Education, Skills and Training Deprivation Domain | Measures the lack of attainment and skills in the local population                                                                     | 13.5%                                                                    |
| Health Deprivation and Disability Domain          | Measures the risk of premature death and the impairment of quality of life through poor physical or mental health                      | 13.5%                                                                    |
| Crime Domain                                      | Measures the risk of personal and material victimisation at local level                                                                | 9.3%                                                                     |
| Barriers to Housing and Services Domain           | Measures the physical and financial accessibility of housing and local services (schools, supermarkets, primary care and post offices) | 9.3%                                                                     |
| Living Environment Deprivation Domain             | Measures the quality of the local environment (housing, air quality and road traffic accidents)                                        | 9.3%                                                                     |
| <b>Index of Multiple Deprivation (IMD)</b>        | <b>Overall measure of deprivation constructed by the weighted sum of the above domains</b>                                             |                                                                          |
| Welsh Index of Multiple Deprivation (WIMD) Domain | Description                                                                                                                            | Weighting for construction of Welsh Index of Multiple Deprivation (WIMD) |
| Income Domain                                     | Proportion of population experiencing deprivation due to low income                                                                    | 23.5%                                                                    |
| Employment Domain                                 | Proportion of working age population excluded from the labor market                                                                    | 23.5%                                                                    |
| Health Domain                                     | Measures the lack of good health                                                                                                       | 14.0%                                                                    |
| Education Domain                                  | Measures the extent of deprivation relating to education, training and skills                                                          | 14.0%                                                                    |
| Access to Services Domain                         | Measures deprivation due to a house holds inability to access services considered necessary for day to day living.                     | 10.0%                                                                    |
| Community Safety Domain                           | Measures deprivation relating to living in a safe community                                                                            | 5.0%                                                                     |
| Physical Environment Domain                       | Measures factors in the local area that may impact on wellbeing or quality of life                                                     | 5.0%                                                                     |
| Housing Domain                                    | Measures deprivation through lack of adequate housing                                                                                  | 5.0%                                                                     |
| <b>Welsh Index of Multiple Deprivation (WIMD)</b> | <b>Overall measure of deprivation constructed by the weighted sum of the above domains</b>                                             |                                                                          |

**Supplementary Material 2**

Supplementary Figure - Relationship between laboratory-confirmed Lyme disease case numbers (2013-2016) in England and the component measures of the English Indices of Deprivation 2015.

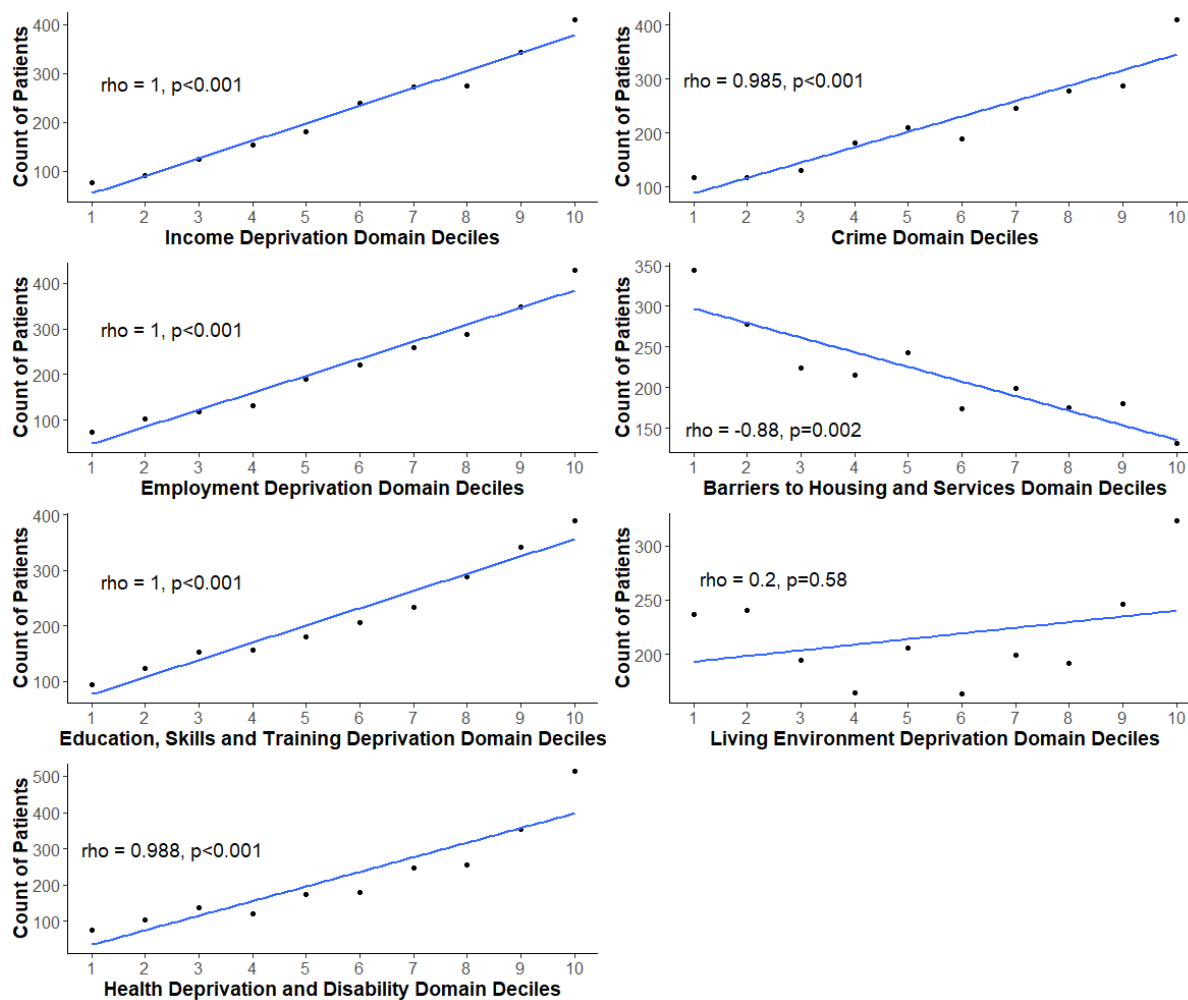

**STROBE 2007 (v4) checklist of items to be included in reports of observational studies in epidemiology\***  
**Checklist for cohort, case-control, and cross-sectional studies (combined)**

| Section/Topic             | Item # | Recommendation                                                                                                                                                                                                                                                                                                                                                                                                                                                         | Reported on page # |
|---------------------------|--------|------------------------------------------------------------------------------------------------------------------------------------------------------------------------------------------------------------------------------------------------------------------------------------------------------------------------------------------------------------------------------------------------------------------------------------------------------------------------|--------------------|
| Title and abstract        | 1      | (a) Indicate the study’s design with a commonly used term in the title or the abstract                                                                                                                                                                                                                                                                                                                                                                                 | 2                  |
|                           |        | (b) Provide in the abstract an informative and balanced summary of what was done and what was found                                                                                                                                                                                                                                                                                                                                                                    | 2                  |
| <b>Introduction</b>       |        |                                                                                                                                                                                                                                                                                                                                                                                                                                                                        |                    |
| Background/rationale      | 2      | Explain the scientific background and rationale for the investigation being reported                                                                                                                                                                                                                                                                                                                                                                                   | 4-6                |
| Objectives                | 3      | State specific objectives, including any pre-specified hypotheses                                                                                                                                                                                                                                                                                                                                                                                                      | 6                  |
| <b>Methods</b>            |        |                                                                                                                                                                                                                                                                                                                                                                                                                                                                        |                    |
| Study design              | 4      | Present key elements of study design early in the paper                                                                                                                                                                                                                                                                                                                                                                                                                | 6                  |
| Setting                   | 5      | Describe the setting, locations, and relevant dates, including periods of recruitment, exposure, follow-up, and data collection                                                                                                                                                                                                                                                                                                                                        | 6                  |
| Participants              | 6      | (a) <i>Cohort study</i> —Give the eligibility criteria, and the sources and methods of selection of participants. Describe methods of follow-up<br><i>Case-control study</i> —Give the eligibility criteria, and the sources and methods of case ascertainment and control selection. Give the rationale for the choice of cases and controls<br><i>Cross-sectional study</i> —Give the eligibility criteria, and the sources and methods of selection of participants | 6                  |
|                           |        | (b) <i>Cohort study</i> —For matched studies, give matching criteria and number of exposed and unexposed<br><i>Case-control study</i> —For matched studies, give matching criteria and the number of controls per case                                                                                                                                                                                                                                                 | N/A                |
| Variables                 | 7      | Clearly define all outcomes, exposures, predictors, potential confounders, and effect modifiers. Give diagnostic criteria, if applicable                                                                                                                                                                                                                                                                                                                               | 6-8                |
| Data sources/ measurement | 8*     | For each variable of interest, give sources of data and details of methods of assessment (measurement). Describe comparability of assessment methods if there is more than one group                                                                                                                                                                                                                                                                                   | 6-8                |
| Bias                      | 9      | Describe any efforts to address potential sources of bias                                                                                                                                                                                                                                                                                                                                                                                                              | N/A                |
| Study size                | 10     | Explain how the study size was arrived at                                                                                                                                                                                                                                                                                                                                                                                                                              | 6                  |
| Quantitative variables    | 11     | Explain how quantitative variables were handled in the analyses. If applicable, describe which groupings were chosen and why                                                                                                                                                                                                                                                                                                                                           | 6-8                |
| Statistical methods       | 12     | (a) Describe all statistical methods, including those used to control for confounding                                                                                                                                                                                                                                                                                                                                                                                  | 6-8                |
|                           |        | (b) Describe any methods used to examine subgroups and interactions                                                                                                                                                                                                                                                                                                                                                                                                    | N/A                |
|                           |        | (c) Explain how missing data were addressed                                                                                                                                                                                                                                                                                                                                                                                                                            | N/A                |
|                           |        | (d) <i>Cohort study</i> —If applicable, explain how loss to follow-up was addressed<br><i>Case-control study</i> —If applicable, explain how matching of cases and controls was addressed                                                                                                                                                                                                                                                                              | N/A                |

|                          |     |                                                                                                                                                                                                              |       |
|--------------------------|-----|--------------------------------------------------------------------------------------------------------------------------------------------------------------------------------------------------------------|-------|
|                          |     | <i>Cross-sectional study</i> —If applicable, describe analytical methods taking account of sampling strategy                                                                                                 |       |
|                          |     | (e) Describe any sensitivity analyses                                                                                                                                                                        | N/A   |
| <b>Results</b>           |     |                                                                                                                                                                                                              |       |
| Participants             | 13* | (a) Report numbers of individuals at each stage of study—eg numbers potentially eligible, examined for eligibility, confirmed eligible, included in the study, completing follow-up, and analysed            | 8     |
|                          |     | (b) Give reasons for non-participation at each stage                                                                                                                                                         | N/A   |
|                          |     | (c) Consider use of a flow diagram                                                                                                                                                                           | N/A   |
| Descriptive data         | 14* | (a) Give characteristics of study participants (eg demographic, clinical, social) and information on exposures and potential confounders                                                                     | 8-10  |
|                          |     | (b) Indicate number of participants with missing data for each variable of interest                                                                                                                          | 8-10  |
|                          |     | (c) <i>Cohort study</i> —Summarise follow-up time (eg, average and total amount)                                                                                                                             | N/A   |
| Outcome data             | 15* | <i>Cohort study</i> —Report numbers of outcome events or summary measures over time                                                                                                                          | N/A   |
|                          |     | <i>Case-control study</i> —Report numbers in each exposure category, or summary measures of exposure                                                                                                         | N/A   |
|                          |     | <i>Cross-sectional study</i> —Report numbers of outcome events or summary measures                                                                                                                           | 8-10  |
| Main results             | 16  | (a) Give unadjusted estimates and, if applicable, confounder-adjusted estimates and their precision (eg, 95% confidence interval). Make clear which confounders were adjusted for and why they were included | 8-10  |
|                          |     | (b) Report category boundaries when continuous variables were categorized                                                                                                                                    | 8-10  |
|                          |     | (c) If relevant, consider translating estimates of relative risk into absolute risk for a meaningful time period                                                                                             | N/A   |
| Other analyses           | 17  | Report other analyses done—eg analyses of subgroups and interactions, and sensitivity analyses                                                                                                               | 8-10  |
| <b>Discussion</b>        |     |                                                                                                                                                                                                              |       |
| Key results              | 18  | Summarise key results with reference to study objectives                                                                                                                                                     | 10-11 |
| Limitations              | 19  | Discuss limitations of the study, taking into account sources of potential bias or imprecision. Discuss both direction and magnitude of any potential bias                                                   | 14-15 |
| Interpretation           | 20  | Give a cautious overall interpretation of results considering objectives, limitations, multiplicity of analyses, results from similar studies, and other relevant evidence                                   | 15-16 |
| Generalisability         | 21  | Discuss the generalisability (external validity) of the study results                                                                                                                                        | 15-16 |
| <b>Other information</b> |     |                                                                                                                                                                                                              |       |
| Funding                  | 22  | Give the source of funding and the role of the funders for the present study and, if applicable, for the original study on which the present article is based                                                | 16    |

\*Give information separately for cases and controls in case-control studies and, if applicable, for exposed and unexposed groups in cohort and cross-sectional studies.

**Note:** An Explanation and Elaboration article discusses each checklist item and gives methodological background and published examples of transparent reporting. The STROBE checklist is best used in conjunction with this article (freely available on the Web sites of PLoS Medicine at <http://www.plosmedicine.org/>, Annals of Internal Medicine at <http://www.annals.org/>, and Epidemiology at <http://www.epidem.com/>). Information on the STROBE Initiative is available at [www.strobe-statement.org](http://www.strobe-statement.org).
